# Supplementary material for: Tuberculosis-associated IFN-I induces Siglec-1 on tunneling nanotubes and favors HIV-1 spread in macrophages
Source: eLife. 2020 Mar 30;9:e52535. doi: 10.7554/eLife.52535 (PMC7173963; doi:10.7554/eLife.52535)
Supplement: Figure 1—source data 1. [file elife-52535-fig1-data1.xlsx]

## Sheet: Feuil1
Figure 1B	Raw data
Gene transcript abundance of SIGLEC-1 relative to GAPDH
Donor #	cmCTR treated	cmMTB treated		Statistical analysis: column statistics				Statistical analysis: t tests
16	0.00773	0.0198			cmCTR treated	cmMTB treated		Wilcoxon matched-pairs signed rank test
618	0.00527	0.00984		Number of values	14	14		P value	0.0001
699	0.0015704	0.0131734						Exact or approximate P value?	Exact
845	0.01123	0.03799		Minimum	0.001377	0.00984		P value summary	***
574	0.0129914	0.0294317		25% Percentile	0.003196	0.02702		Significantly different (P < 0.05)?	Yes
611	0.0139848	0.0334929		Median	0.00948	0.04345		One- or two-tailed P value?	Two-tailed
674	0.0646324	0.127895		75% Percentile	0.01909	0.1061		Sum of positive, negative ranks	0,000 , -105,0
144	0.00178605	0.0355898		Maximum	0.06463	0.1406		Sum of signed ranks (W)	-105
506	0.0186811	0.140565						Number of pairs	14
624	0.00366601	0.0659412		Mean	0.01445	0.06201		Number of ties (ignored)	0
405	0.0203063	0.101936		Std. Deviation	0.01701	0.04478
120	0.00137706	0.0489049		Std. Error of Mean	0.004545	0.01197		Median of differences
236	0.033348	0.0849036						Median	-0.04067
403	0.00572272	0.118734		Lower 95% CI of mean	0.004631	0.03616
				Upper 95% CI of mean	0.02427	0.08787		How effective was the pairing?
								rs (Spearman)	0.5121
				Sum	0.2023	0.8682		P value (one tailed)	0.032
								P value summary	*
				D'Agostino & Pearson normality test				Was the pairing significantly effective?	Yes
				K2	19.16	2.482
				P value	<0,0001	0.289
				Passed normality test (alpha=0.05)?	No	Yes
				P value summary	****	ns
Figure 1C	Raw data
MFI Siglec-1
Donor #	cmCTR treated	cmMTB treated		Statistical analysis: column statistics				Statistical analysis: t tests
20-	157	609			cmCTR treated	cmMTB treated		Wilcoxon matched-pairs signed rank test
897	152	379		Number of values	29	29		P value	<0,0001
969	188	1126						Exact or approximate P value?	Exact
78-	64.2	2472		Minimum	64.2	308		P value summary	****
225	225	3227		25% Percentile	100	611.5		Significantly different (P < 0.05)?	Yes
602	87	809		Median	226	1059		One- or two-tailed P value?	Two-tailed
13-	377	1327		75% Percentile	368	1702		Sum of positive, negative ranks	435,0 , 0,000
236	262	1120		Maximum	762	4393		Sum of signed ranks (W)	435
653	239	4393		Range	697.8	4085		Number of pairs	29
768	489	3781						Number of ties (ignored)	0
574	128	481		Mean	254.3	1314
611	277	308		Std. Deviation	168.5	1032		Median of differences
432	359	870		Std. Error of Mean	31.29	191.7		Median	722
831	439	954
184	504	787		Lower 95% CI of mean	190.2	921.6		How effective was the pairing?
432	762	1298		Upper 95% CI of mean	318.4	1707		rs (Spearman)	0.3153
831	505	1059						P value (one tailed)	0.0478
615	259	1694		Geometric mean	204.7	1022		P value summary	*
818	297	707		Geometric SD factor	1.993	2.038		Was the pairing significantly effective?	Yes
1	113	429
2	79	354
3	79	396		D'Agostino & Pearson test
4	381	1709		K2	8.479	15.5
5	226	1083		P value	0.0144	0.0004
6	270	2319		Passed normality test (alpha=0.05)?	No	No
7	207	1798		P value summary	*	***
8	84.2	1067
9	86.4	946
10	78.2	614
Figure 1D	Raw data
Siglec-1 antibody binding site
Donor #	cmCTR treated	cmMTB treated		Statistical analysis: column statistics				Statistical analysis: t tests
1	253	689.2			cmCTR treated	cmMTB treated		Wilcoxon matched-pairs signed rank test
2	795.8	4240.2		Number of values	6	6		P value	0.0313
3	69.1	631						Exact or approximate P value?	Exact
4	12.5	452.3		Minimum	12.5	445.8		P value summary	*
5	131.2	864		25% Percentile	54.95	450.7		Significantly different (P < 0.05)?	Yes
6	146	445.8		Median	138.6	660.1		One- or two-tailed P value?	Two-tailed
				75% Percentile	388.7	1708		Sum of positive, negative ranks	21,00 , 0,000
				Maximum	795.8	4240		Sum of signed ranks (W)	21
				Range	783.3	3794		Number of pairs	6
								Number of ties (ignored)	0
				Mean	234.6	1220
				Std. Deviation	286.5	1488		Median of differences
				Std. Error of Mean	117	607.3		Median	500.9
				Lower 95% CI of mean	-66.11	-340.8		How effective was the pairing?
				Upper 95% CI of mean	535.3	2782		rs (Spearman)	0.5429
								P value (one tailed)	0.1486
				Geometric mean	122.2	827.6		P value summary	ns
				Geometric SD factor	3.997	2.316		Was the pairing significantly effective?	No
				Kolmogorov-Smirnov test
				KS distance	0.3077	0.428
				P value	0.0786	0.001
				Passed normality test (alpha=0.05)?	Yes	No
				P value summary	ns	***
Figure 1F	Raw data
%Siglec-1+ alveolar macrophages
	Slice	Siglec-1+	Siglec-1-	Total	%Siglec-1+ AM			Statistical analysis: column statistics						Statistical analysis: t test
coinfected ATB/SIV	HT09-01	199	54	253	78.6561									Mann-Whitney test
	HT09-02	127	52	179	70.9497				Healthy	ATB	ATB-SIV	SIV			Healthy vs ATB	ATB vs ATB-SIV	Healthy vs ATB-SIV	Healthy vs SIV	SIV vs ATB	SIV vs ATB-SIV
	HT09-03	311	114	425	73.1765			Number of values	30	11	4	13		P value	<0,0001	0.0015	<0,0001	0.0001	0.0696	0.0008
	HT09-04	130	49	179	72.6257									Exact or approximate P value?	Exact	Exact	Exact	Exact	Exact	Exact
	HT09-05	165	124	289	57.0934			Minimum	6.8	25.9	70.95	18.2		P value summary	****	**	****	***	ns	***
ATBSIV sum		932	393	1325	0.703396			25% Percentile	13.35	31.7	71.37	23.9		Significantly different (P < 0.05)?	Yes	Yes	Yes	Yes	No	Yes
infected ATB	CL10-01	19	35	54	35.1852			Median	17.3	35.2	72.9	31.3		One- or two-tailed P value?	Two-tailed	Two-tailed	Two-tailed	Two-tailed	Two-tailed	Two-tailed
	CL10-02	23	47	70	32.8571			75% Percentile	22.05	42.1	77.29	37.25		Sum of ranks in column A,B	480 , 381	66 , 54	465 , 130	522 , 424	169 , 131	62 , 91
	CL10-03	76	53	129	58.9147			Maximum	36.8	58.9	78.66	44.6		Mann-Whitney U	15	0	0	57	40	0
	CL10-04	32	69	101	31.6832			Range	30	33	7.706	26.4
	CL10-05	15	43	58	25.8621									Difference between medians
	CL10-06	16	23	39	41.0256			Mean	18.35	38.68	73.85	30.56		Median of column A	17,30, n=30	35,20, n=11	17,30, n=30	17,30, n=30	35,20, n=11	72,90, n=4
	CL10-09	24	33	57	42.1053			Std. Deviation	7.746	10.02	3.34	8.735		Median of column B	35,20, n=11	72,90, n=4	72,90, n=4	31,30, n=13	31,30, n=13	31,30, n=13
	CL10-14	30	26	56	53.5714			Std. Error of Mean	1.414	3.023	1.67	2.423		Difference: Actual	17.9	37.7	55.6	14	-3.9	-41.6
	CL10-16	28	41	69	40.5797									Difference: Hodges-Lehmann	19.25	38.01	56.31	11.95	-8	-45.4
	CL10-18	40	84	124	32.2581			Lower 95% CI of mean	15.45	31.95	68.54	25.28
	CL10-20	21	46	67	31.3433			Upper 95% CI of mean	21.24	45.42	79.17	35.84
ATB sum		324	500	824	0.393204
infected SIV	BA34-01	4	18	22	18.1818			Geometric mean	16.72	37.61	73.8	29.42
	BA34-02	14	29	43	32.5581			Geometric SD factor	1.573	1.278	1.046	1.335
	BA34-03	38	103	141	26.9504
	BA34-04	40	88	128	31.25
	BA34-05	16	48	64	25			D'Agostino & Pearson test
	BA34-06	19	41	60	31.6667			K2	2.242	2.652	N too small	0.8985
	BA34-07	23	78	101	22.7723			P value	0.3259	0.2655		0.6381
	BA34-08	23	94	117	19.6581			Passed normality test (alpha=0.05)?	Yes	Yes		Yes
	BA34-09	13	38	51	25.4902			P value summary	ns	ns		ns
	BA34-10	8	16	24	33.3333
	BA34-11	29	36	65	44.6154
	BA34-14	12	15	27	44.4444			Kolmogorov-Smirnov test
	BA34-15	7	10	17	41.1765			KS distance	0.0992	0.1847	N too small	0.1462
SIV sum		246	614	860	0.286047			P value	>0,1000	>0,1000		>0,1000
HS	IT02-01	5	18	23	21.7391			Passed normality test (alpha=0.05)?	Yes	Yes		Yes
	IT02-02	6	14	20	30			P value summary	ns	ns		ns
	IT02-03	5	20	25	20
	IT02-04	3	18	21	14.2857
	IT02-05	4	23	27	14.8148
	IT02-06	4	33	37	10.8108
	IT02-07	5	21	26	19.2308
	IT02-08	2	26	28	7.14286
	IT02-09	7	12	19	36.8421
	IT02-10	5	14	19	26.3158
	IT02-11	4	27	31	12.9032
	IT02-12	6	20	26	23.0769
	IT02-13	4	20	24	16.6667
	IT02-14	4	16	20	20
	IT02-15	4	21	25	16
	IT02-16	5	23	28	17.8571
	IT02-17	6	23	29	20.6897
	IT02-18	8	21	29	27.5862
	IT02-19	4	15	19	21.0526
	IT02-20	3	16	19	15.7895
	IT02-21	5	32	37	13.5135
	IT02-22	5	22	27	18.5185
	IT02-23	3	41	44	6.81818
	IT02-24	6	17	23	26.087
	IT02-25	7	13	20	35
	IT02-26	3	34	37	8.10811
	IT02-27	3	27	30	10
	IT02-28	10	50	60	16.6667
	IT02-29	4	52	56	7.14286
	IT02-30	6	32	38	15.7895
HS sum		146	721	867	0.168397
%Siglec-1+ cells/mm² of lung tissue
NHP#	Healthy	SIV	TB	TB-SIV
BA34		2
GI53	0.5
EC61	0.4
HP22				5.1
GK87			7.9
CL10			4.5
BK48		1.3
CA75			1.5
CG58			3.3
DD87		1.1
DR28		1.4
DT18		1.5
ER44				2.3
FE10			1.4
FJ05			3.2
HB12				2.3
HP41				4.9
HT09				8.1
ID01				1.2
IT02	0.5
IT27		3.2
				Statistical analysis: column statistics						Statistical analysis: t test
					Healthy	SIV	TB	TB-SIV		Mann Whitney test
				Number of values	3	6	6	6			Healthy vs SIV	Healthy vs TB	Healthy vs TB-SIV	SIV vs TB-SIV	SIV vs TB	TB vs TB-SIV
										P value	0.0238	0.0238	0.0238	0.0844	0.0801	0.7857
				Minimum	0.4	1.1	1.4	1.2		Exact or approximate P value?	Exact	Exact	Exact	Exact	Exact	Exact
				25% Percentile	0.4	1.25	1.475	2.025		P value summary	*	*	*	ns	ns	ns
				Median	0.5	1.45	3.25	3.6		Significantly different (P < 0.05)?	Yes	Yes	Yes	No	No	No
				75% Percentile	0.5	2.3	5.35	5.85		One- or two-tailed P value?	Two-tailed	Two-tailed	Two-tailed	Two-tailed	Two-tailed	Two-tailed
				Maximum	0.5	3.2	7.9	8.1		Sum of ranks in column A,B	6 , 39	6 , 39	6 , 39	28 , 50	27,50 , 50,50	37 , 41
				Range	0.1	2.1	6.5	6.9		Mann-Whitney U	0	0	0	7	6.5	16
				Mean	0.4667	1.75	3.633	3.983		Difference between medians
				Std. Deviation	0.05774	0.7714	2.4	2.547		Median of column A	0,5000, n=3	0,5000, n=3	0,5000, n=3	1,450, n=6	1,450, n=6	3,250, n=6
				Std. Error of Mean	0.03333	0.3149	0.9797	1.04		Median of column B	1,450, n=6	3,250, n=6	3,600, n=6	3,600, n=6	3,250, n=6	3,600, n=6
										Difference: Actual	0.95	2.75	3.1	2.15	1.8	0.35
				Lower 95% CI of mean	0.3232	0.9405	1.115	1.31		Difference: Hodges-Lehmann	1	2.8	3.15	1.45	1.75	0.5
				Upper 95% CI of mean	0.6101	2.559	6.152	6.657
				Geometric mean	0.4642	1.637	3.039	3.297
				Geometric SD factor	1.137	1.466	1.934	2.01
				Kolmogorov-Smirnov test
				KS distance	N too small	0.2937	0.2219	0.2456
				P value		>0,1000	>0,1000	>0,1000
				Passed normality test (alpha=0.05)?		Yes	Yes	Yes
				P value summary		ns	ns	ns
Figure 1H	Raw data
Correlation : %Siglec-1+ cells/mm² of lung tissue vs pathological score
NHP#	Pathological score		%Siglec-1+ cells
EC61	3		0.4
GI53	4		0.5
IT02	6		0.5
DT18	8		1.5
BK48	11		1.3
DD87	16		1.1
BA34	26		2
DR28	16		1.4
IT27	40		3.2
CA75	9		1.5
FE10	11		1.4
FJ05	25		3.2
GK87	21		7.9
CL10	18		4.5
CG58	7		3.3
HB12	22		2.3
ID01	16		1.2
ER44	24		2.3
HP22	35		5.1
HT09	32		8.1
HP41	33		4.9
				Statistical analysis: Non linear fit				Statistical analysis: correlation, non parametric
				First order polynomial (straight line)				Spearman r
				Best-fit values				r	0.7261
				B0	0.3673			95% confidence interval	0,4175 to 0,8845
				B1	0.1303
				95% CI (profile likelihood)				P value
				B0	-1,251 to 1,985			P (two-tailed)	0.0002
				B1	0,05348 to 0,2070			P value summary	***
				Goodness of Fit				Exact or approximate P value?	Approximate
				Degrees of Freedom	19			Significant? (alpha = 0.05)	Yes
				R squared	0.399
				Sum of Squares	59.91			Number of XY Pairs	21
				Sy.x	1.776
				Number of points
				# of X values	21
				# Y values analyzed	21
