# Supplementary material for: Tuberculosis-associated IFN-I induces Siglec-1 on tunneling nanotubes and favors HIV-1 spread in macrophages
Source: eLife. 2020 Mar 30;9:e52535. doi: 10.7554/eLife.52535 (PMC7173963; doi:10.7554/eLife.52535)
Supplement: Figure 2—source data 1. [file elife-52535-fig2-data1.xlsx]

## Sheet: Feuil1
Figure 2A	Raw data
IFN-I dosage in cmCTR or cmMTB
Donor #	cmCTR	cmMTB					Statistical analysis: column statistics						Statistical analysis: t tests
148	0	2.89583						cmCTR	cmMTB
111	0.8125	12.0625					Number of values	38	38				Wilcoxon matched-pairs signed rank test
266	0	1.5625											P value	<0,0001
463	3.64583	6.64583					Minimum	0	1.563				Exact or approximate P value?	Exact
626	3.5625	9.8125					25% Percentile	0.2273	3.57				P value summary	****
413	3.3125	8.97917					Median	0.9341	6.646				Significantly different (P < 0.05)?	Yes
604	1.8125	19.6458					75% Percentile	3.35	17.89				One- or two-tailed P value?	Two-tailed
807	1.0625	6.64583					Maximum	20.9	36.92				Sum of positive, negative ranks	741,0 , 0,000
18/03	6.5625	19.6458					Range	20.9	35.36				Sum of signed ranks (W)	741
636	20.8958	28.2292											Number of pairs	38
09/08	1.72917	5.22917					Mean	2.204	10.56				Number of ties (ignored)	0
17/06	3.72917	17.8958					Std. Deviation	3.66	8.841
413	2.94872	4.80769					Std. Error of Mean	0.5937	1.434				Median of differences
498	0.961538	3.84615											Median	5.537
604	3.97436	22.4359					Lower 95% CI of mean	1.001	7.653
636	0.641026	36.9231					Upper 95% CI of mean	3.407	13.46				How effective was the pairing?
712	0	3.78205											rs (Spearman)	0.3662
767	6.98718	15.9615					Geometric mean		7.446				P value (one tailed)	0.0119
778	3.46154	5.76923					Geometric SD factor		2.381				P value summary	*
874	0.25641	2.75641											Was the pairing significantly effective?	Yes
15/04	0.0641026	28.7821					D'Agostino & Pearson test
17/06	0	17.8846					K2	61	9.428
19/07	2.88462	3.26923					P value	<0,0001	0.009
22/08	2.17949	8.97436					Passed normality test (alpha=0.05)?	No	No
431	1.39275	5.06475					P value summary	****	**
111	6.06375	18.0517
231	1.09575	7.26075
20	0.51075	3.66975
533	0.42975	1.79775
700	0.24075	2.57175
28/06	0.066375	14.0917
266	0.34875	5.83875
24/06	0.18675	17.3227
17/06	0	18.2318
783	0.90675	2.75175
769	0.17775	4.52475
205	0.53775	2.41875
956	0.32175	3.20175
Figure 2B	Raw data
MFI Siglec-1 with different cytokine treatment
Donor #	cmCTR	cmMTB	IL-10	IFNb			Statistical analysis: column statistics						Statistical analysis: t tests
D202	130	1543	275	1309				cmCTR	cmMTB	IL-10	IFNb		Wilcoxon matched-pairs signed rank test
D239	307	1069	429	1377			Number of values	13	14	12	13			cmCTR vs IL-10	cmCTR vs IFNb	cmCTR vs cmMTB	IL-10 vs cmMTB	cmMTB vs IFNb	IL-10 vs IFNb
D164	305	2658	680	3295									P value	0.001	0.0005	0.0002	0.0005	0.0398	0.002
D178	230	2344	443	2522			Minimum	58.1	501	100	216		Exact or approximate P value?	Exact	Exact	Exact	Exact	Exact	Exact
D500	259	734	362	262			25% Percentile	73.75	918	142.3	336		P value summary	***	***	***	***	*	**
D213	358	3158	1132	3148			Median	124	1178	258	659		Significantly different (P < 0.05)?	Yes	Yes	Yes	Yes	Yes	Yes
D263		1054	115	795			75% Percentile	282	2262	439.5	1950		One- or two-tailed P value?	Two-tailed	Two-tailed	Two-tailed	Two-tailed	Two-tailed	Two-tailed
D271	89.9	1181	241	659			Maximum	358	3158	1132	3295		Sum of positive, negative ranks	66,00 , 0,000	78,00 , 0,000	91,00 , 0,000	0,000 , -78,00	16,00 , -75,00	65,00 , -1,000
D452	124	2235	98,8*	528									Sum of signed ranks (W)	66	78	91	-78	-59	64
D516	60.7	955	61,2*	216			Mean	166.8	1492	351.8	1169		Number of pairs	11	12	13	12	13	11
D306	58.1	501	100				Std. Deviation	108.7	799	300.5	1112		Number of ties (ignored)	0	0	0	0	0	0
D495	77.2	1174	157	418			Std. Error of Mean	30.16	213.5	86.74	308.3
D507	99.2	1481	141	397									Median of differences
D602	70.3	807	146	275			Lower 95% CI of mean	101.1	1031	160.8	497.5		Median	122	486.6	1097	-978.5	-472	680
							Upper 95% CI of mean	232.5	1954	542.7	1841
													How effective was the pairing?
							Sum	2168	20894	4221	15201		rs (Spearman)	0.9	0.7273	0.6044	0.6923	0.7747	0.7
													P value (one tailed)	0.0002	0.0048	0.016	0.0078	0.0014	0.0102
							KS normality test						P value summary	***	**	*	**	**	*
							KS distance	0.2479	0.2231	0.214	0.2472		Was the pairing significantly effective?	Yes	Yes	Yes	Yes	Yes	Yes
							P value	0.0281	0.0573	>0,1000	0.0289
							Passed normality test (alpha=0.05)?	No	Yes	Yes	No
							P value summary	*	ns	ns	*
							D'Agostino & Pearson test
							K2	3.137	2.335	11.93	3.504
							P value	0.2083	0.3112	0.0026	0.1735
							Passed normality test (alpha=0.05)?	Yes	Yes	No	Yes
							P value summary	ns	ns	**	ns
Figure 2C	Raw data
MFI Siglec-1 in IL-10 depleted cmMTB
Donor #	cmCTR	cmMTB aIgG	cmMTB aIL-10				Statistical analysis: column statistics						Statistical analysis: t tests
D326	120	785	763										Wilcoxon matched-pairs signed rank test
D422	111	601	588					cmCTR	cmMTB αIgG	cmMTB αIL-10				cmCTR vs IgG	cmCTR vs aIL-10	IgG vs aIL-10
D595	122	428	335				Number of values	7	7	7			P value	0.0156	0.0156	0.375
D726	170	747	650										Exact or approximate P value?	Exact	Exact	Exact
D909	163	1004	829				Minimum	88.9	379	335			P value summary	*	*	ns
D462	93.2	379	497				25% Percentile	93.2	428	497			Significantly different (P < 0.05)?	Yes	Yes	No
D622	88.9	497	518				Median	120	601	588			One- or two-tailed P value?	Two-tailed	Two-tailed	Two-tailed
							75% Percentile	163	785	763			Sum of positive, negative ranks	28,00 , 0,000	28,00 , 0,000	8,000 , -20,00
							Maximum	170	1004	829			Sum of signed ranks (W)	28	28	-12
							Range	81.1	625	494			Number of pairs	7	7	7
													Number of ties (ignored)	0	0	0
							Mean	124	634.4	597.1
							Std. Deviation	31.64	223.5	167.9			Median of differences
							Std. Error of Mean	11.96	84.49	63.46			Median	490	477	-22
							Lower 95% CI of mean	94.75	427.7	441.9			How effective was the pairing?
							Upper 95% CI of mean	153.3	841.2	752.4			rs (Spearman)	0.5714	0.4643	0.9643
													P value (one tailed)	0.1	0.1512	0.0014
							Geometric mean	120.7	601.6	575.3			P value summary	ns	ns	**
							Geometric SD factor	1.284	1.423	1.355			Was the pairing significantly effective?	No	No	Yes
							Kolmogorov-Smirnov test
							KS distance	0.2397	0.1592	0.1326
							P value	>0,1000	>0,1000	>0,1000
							Passed normality test (alpha=0.05)?	Yes	Yes	Yes
							P value summary	ns	ns	ns
Figure 2D	Raw data
MFI Siglec-1 in cmMTB with aIFNAR antibody
Donor #	cmCTR	cmMTB aIgG	cmMTB aIFNAR				Statistical analysis: column statistics						Statistical analysis: t tests
192	66.1	151	81.8					cmCTR	cmMTB aIgG	cmMTB aIFNAR			Wilcoxon matched-pairs signed rank test
272	68.7	227	105				Number of values	8	8	8				cmCTR vs aIFNAR	aIFNAR vs IgG	cmCTR vs IgG
528	261	673	301										P value	0.1953	0.0078	0.0078
624	261	1348	454				Minimum	66.1	151	81.8			Exact or approximate P value?	Exact	Exact	Exact
719	162	347	174				25% Percentile	86.53	257	118.8			P value summary	ns	**	**
851	140	420	160				Median	168.5	426.5	196			Significantly different (P < 0.05)?	No	Yes	Yes
781	686	732	302				75% Percentile	261	717.3	301.8			One- or two-tailed P value?	Two-tailed	Two-tailed	Two-tailed
860	175	433	218				Maximum	686	1348	454			Sum of positive, negative ranks	28,00 , -8,000	0,000 , -36,00	36,00 , 0,000
							Range	619.9	1197	372.2			Sum of signed ranks (W)	20	-36	36
													Number of pairs	8	8	8
							Mean	227.5	541.4	224.5			Number of ties (ignored)	0	0	0
							Std. Deviation	199.4	381.7	123
							Std. Error of Mean	70.51	134.9	43.49			Median of differences
													Median	28.15	-237.5	221.5
							Lower 95% CI of mean	60.74	222.3	121.6
							Upper 95% CI of mean	394.2	860.5	327.3			How effective was the pairing?
													rs (Spearman)	0.9581	0.9762	0.9341
							Geometric mean	174.1	441.2	195.7			P value (one tailed)	0.0003	0.0002	0.0008
							Geometric SD factor	2.142	1.994	1.773			P value summary	***	***	***
													Was the pairing significantly effective?	Yes	Yes	Yes
							D'Agostino & Pearson test
							K2	13.3	6.272	1.361
							P value	0.0013	0.0435	0.5063
							Passed normality test (alpha=0.05)?	No	No	Yes
							P value summary	**	*	ns
Figure 2F	Raw data
Correlation between pSTAT1 and Siglec-1 positive cells in NHP lungs							Statistical analysis: non linear fit
NHP#	CD169+ cells/mm2	pSTAT1+ cells/mm2					First order polynomial (straight line)
HS1	0.5	0					Best-fit values
HS2	0.4	0					B0	-0.1821
HS3	0.5	0.01					B1	0.2058
							95% CI (profile likelihood)
SIV1	2	0.04					B0	-0,4497 to 0,08557
SIV 2	1.3	0.22					B1	0,1294 to 0,2822
SIV3	1.1	0					Goodness of Fit
SIV4	1.4	0.01					Degrees of Freedom	19
SIV5	1.5	0.02					R squared	0.6258
SIV6	3.2	0.28					Sum of Squares	2.524
							Sy.x	0.3644
ATB1	7.9	2.38
ATB2	4.5	0.78					Number of points
LTB1	1.5	0.64					# of X values	21
ATB3	3.3	1.01					# Y values analyzed	21
LTB2	1.4	0.21
LTB3	3.2	0.05
							Statistical analysis: spearman correlation
ATBSIV3	5.1	0.22					Spearman r
LTBSIV1	2.3	0.07					r	0.7735
LTBSIV2	2.3	0.23					95% confidence interval	0,5031 to 0,9060
ATBSIV1	4.9	0.33
ATBSIV2	8.1	1.29					P value
LTBSIV3	1.2	0.24					P (two-tailed)	<0,0001
							P value summary	****
							Exact or approximate P value?	Approximate
							Significant? (alpha = 0.05)	Yes
							Number of XY Pairs	21
Figure 2H	Raw data
%pSTAT1+ alveolar macrophages							Statistical analysis: descriptive						Statistical analysis: t test
	Slice	pSTAT1+	pSTAT1-	Total	%pSTAT1+ AM								Mann Whitney test
coinfected ATB/SIV	HT09-04	98	15	113	86.7257			Healthy	SIV	ATB	ATB-SIV			Healthy vs SIV	Healthy vs TB	Healthy vs TB-SIV	SIV vs TB	SIV vs TB-SIV	TB vs TB-SIV
	HT09-01	51	13	64	79.6875		Number of values	23	11	10	5		P value	<0,0001	<0,0001	<0,0001	0.3967	0.0005	0.0007
	HT09-02	77	20	97	79.3814								Exact or approximate P value?	Exact	Exact	Exact	Exact	Exact	Exact
	HT09-03	37	21	58	63.7931		Minimum	0	18.8	11.9	63.79		P value summary	****	****	****	ns	***	***
	HT09-05	59	6	65	90.7692		25% Percentile	0	25	18.98	71.59		Significantly different (P < 0.05)?	Yes	Yes	Yes	No	Yes	Yes
ATBSIV sum		322	75	397	0.811083		Median	0	33.3	31.1	79.69		One- or two-tailed P value?	Two-tailed	Two-tailed	Two-tailed	Two-tailed	Two-tailed	Two-tailed
infected ATB	CL10-01	4	8	12	33.3333		75% Percentile	7.1	49	42.53	88.75		Sum of ranks in column A,B	277 , 318	279 , 282	276 , 130	133,5 , 97,50	66 , 70	55 , 65
	CL10-02	7	34	41	17.0732		Maximum	20.6	51.9	43.2	90.77		Mann-Whitney U	1	3	0	42.5	0	0
	CL10-03	13	32	45	28.8889		Range	20.6	33.1	31.3	26.98
	CL10-04	19	25	44	43.1818								Difference between medians
	CL10-05	14	19	33	42.4242		Mean	3.574	35.67	30.32	80.07		Median of column A	0,000, n=23	0,000, n=23	0,000, n=23	33,30, n=11	33,30, n=11	31,10, n=10
	CL10-06	7	52	59	11.8644		Std. Deviation	5.318	11.46	12.15	10.3		Median of column B	33,30, n=11	31,10, n=10	79,69, n=5	31,10, n=10	79,69, n=5	79,69, n=5
	CL10-07	10	41	51	19.6078		Std. Error of Mean	1.109	3.456	3.843	4.606		Difference: Actual	33.3	31.1	79.69	-2.2	46.39	48.59
	CL10-08	8	29	37	21.6216								Difference: Hodges-Lehmann	32	28.9	79.38	-6.35	46.08	48.12
	CL10-09	12	16	28	42.8571		Lower 95% CI of mean	1.274	27.97	21.63	67.28
	CL10-10	11	15	26	42.3077		Upper 95% CI of mean	5.874	43.37	39.01	92.86
ATB sum		105	271	376	0.279255
infected SIV	BA34-01						Geometric mean		33.93	27.8	79.5
	BA34-02						Geometric SD factor		1.404	1.586	1.145
	BA34-03
	BA34-04						D'Agostino & Pearson test
	BA34-05	8	17	25	32		K2	15.19	1.086	3.217	N too small
	BA34-06	8	28	36	22.2222		P value	0.0005	0.5811	0.2002
	BA34-07	23	34	57	40.3509		Passed normality test (alpha=0.05)?	No	Yes	Yes
	BA34-08	24	25	49	48.9796		P value summary	***	ns	ns
	BA34-09	27	26	53	50.9434
	BA34-10	6	18	24	25		Kolmogorov-Smirnov test
	BA34-11	19	32	51	37.2549		KS distance	0.3579	0.1503	0.2379	0.2733
	BA34-12	8	16	24	33.3333		P value	<0,0001	>0,1000	>0,1000	>0,1000
	BA34-13	6	13	19	31.5789		Passed normality test (alpha=0.05)?	No	Yes	Yes	Yes
	BA34-14	3	13	16	18.75		P value summary	****	ns	ns	ns
	BA34-15	28	26	54	51.8519
SIV sum		160	248	408	0.392157
HS	IT02-01	1	13	14	7.14286
	IT02-02	0	8	8	0
	IT02-03	1	16	17	5.88235
	IT02-04	1	10	11	9.09091
	IT02-05	1	13	14	7.14286
	IT02-06	0	21	21	0
	IT02-07	0	11	11	0
	IT02-08	0	21	21	0
	IT02-09	2	17	19	10.5263
	IT02-10	0	33	33	0
	IT02-11	0	6	6	0
	IT02-12	7	27	34	20.5882
	IT02-13	1	12	13	7.69231
	IT02-14	1	16	17	5.88235
	IT02-15	0	12	12	0
	IT02-16	0	28	28	0
	IT02-17	0	27	27	0
	IT02-18	0	8	8	0
	IT02-19	0	16	16	0
	IT02-20	2	22	24	8.33333
	IT02-21	0	6	6	0
	IT02-22	0	12	12	0
	IT02-23	0	30	30	0
HS sum		17	385	402	0.0422886
