# Supplementary material for: Tuberculosis-associated IFN-I induces Siglec-1 on tunneling nanotubes and favors HIV-1 spread in macrophages
Source: eLife. 2020 Mar 30;9:e52535. doi: 10.7554/eLife.52535 (PMC7173963; doi:10.7554/eLife.52535)
Supplement: Figure 3—source data 1. [file elife-52535-fig3-data1.xlsx]

## Sheet: Feuil1
Figure 3B	Raw data
Quantification of Siglec-1+ TNT according to TNT category
Represented as mean of all TNT
	Siglec-1-		Siglec-1+
Tubulin-	78.3	68.9	0	0
Tubulin+	10.4	23.3	11.8	8.1
Raw data of 1 out of 2 donors					Statistical analysis
	Length (µm)	Microtub	CD169
1	38.669	+	+		Table Analyzed	TNT utub - CD169
2	30.623	+	+
3	19.518	+	+		Two-way RM ANOVA	Matching: Both factors
4	53.702	+	+		Assume sphericity?	Yes
5+6	33.135	+	+		Alpha	0.05
7	32.953	+	+
5+8	31.476	+	+		Source of Variation	% of total variation	P value	P value summary		Significant?
9	16.949	+	+		Row Factor	16.36	0.1249	ns		No
10	6.382	+	-		Column Factor	48.4	0.0285	*		Yes
11	5.401	+	-		Interaction: Row Factor x Column Factor	33.23	0.1225	ns		No
12	18.506	+	-		Interaction: Row Factor x Subject	0.646
13	37.499	+	-		Interaction: Column Factor x Subject	0.0968
14	46.066	+	-		Subject	7.469e-05
15	10.999	+	-
16	8.395	+	-		ANOVA table	SS	DF	MS		F (DFn, DFd)	P value
17	39.281	+	-		Row Factor	1095	1	1095		F (1, 1) = 25,32	P=0,1249
18	11.729	+	-		Column Factor	3240	1	3240		F (1, 1) = 500,0	P=0,0285
19	16.568	+	-		Interaction: Row Factor x Column Factor	2224	1	2224		F (1, 1) = 26,32	P=0,1225
20	12.783	+	-		Interaction: Row Factor x Subject	43.24	1	43.24
21	19.459	+	-		Interaction: Column Factor x Subject	6.48	1	6.48
22	23.228	+	+		Subject	0.005	1	0.005
23	24.758	+	-		Residual	84.5	1	84.5
24	29.732	+	-
25	7.107	+	-		Difference between row means
26	28.653	+	+		Mean of Tubulin-	36.8
27	43.417	+	+		Mean of Tubulin+	13.4
28	45.619	+	+		Difference between means	23.4
29	15.848	+	-		SE of difference	4.65
30	20.518	+	-		95% CI of difference	-35,68 to 82,48
31	14.404	+	-
32	26.561	+	-		Difference between column means
33	28.242	+	+		Mean of Siglec-1-	45.23
34	27.807	+	+		Mean of Siglec-1+	4.975
35	36.417	+	+		Difference between means	40.25
36	44.32	+	+		SE of difference	1.8
37	16.827	+	+		95% CI of difference	17,38 to 63,12
38	25.406	+	+
39	10.515	+	-		Interaction CI
40	13.537	+	+		Mean diff, A1 - B1	73.6
41	8.558	+	-		Mean diff, A2 - B2	6.9
42	21.581	+	+		(A1 -B1) - (A2 - B2)	66.7
43	26.826	+	-		95% CI of difference	-98,48 to 231,9
44	12.977	+	-		(B1 - A1) - (B2 - A2)	-66.7
45	46.6	+	+		95% CI of difference	-231,9 to 98,48
46	22.75	+	-
47	16.081	+	+		Data summary
48	8.753	+	+		Number of columns (Column Factor)	2
49	21.969	+	+		Number of rows (Row Factor)	2
50	36.488	+	+		Number of subjects (Subject)	2
51	63.909	+	+
52	25.32	+	+
53	127.331	+	+
54	18.785	+	-
55	23.373	+	+
56	60.456	+	+
57	44.449	+	+
58	37.562	+	-
59	16.737	+	-
60	30.931	+	+
61	2.946	+	-
62	2.866	+	-
63	56.957	+	+
64	14.862	+	-
65	38.913	+	+
66	20.19	+	+
67+68	65.512	+	+
69	43.693	+	+
70	4.601	+	-
71+72+…+76	57.637	+	-
77	15.568	+	+
78	17.245	+	+
79	27.331	+	+
80	18.764	+	-
81	11.322	+	-
82	5.999	+	-
83	23.025	+	+
84	8.575	+	-
85	9.213	-	-
86	12.02	-	-
87	4.084	-	-
88	2.118	-	-
89	2.924	-	-
90	2.683	-	-
91	3.214	-	-
92	1.301	-	-
93	2.798	-	-
94	3.882	-	-
95	3.324	-	-
96	3.406	-	-
97	5.246	-	-
98	13.604	-	-
99	3.593	-	-
100	3.909	-	-
101	5.765	-	-
102	4.512	-	-
103	4.696	-	-
104	5.65	-	-
105	4.786	-	-
106	3.375	-	-
107	3.726	-	-
108	6.727	-	-
109	4.432	-	-
110	6.079	-	-
111	5.467	-	-
112	4.554	-	-
113	4.942	-	-
114	2.026	-	-
115	3.253	-	-
116	3.599	-	-
117	4.451	-	-
118	3.931	-	-
119	4.601	-	-
120	8.683	-	-
121	6.391	-	-
122	4.403	-	-
123	5.765	-	-
124	6.22	-	-
125	3.777	-	-
126	4.891	-	-
127	6.355	-	-
128	8.734	-	-
129	4.692	-	-
130	7.023	-	-
131	4.545	-	-
132	3.349	-	-
133	7.489	-	-
134	8.443	-	-
135	8.753	-	-
136	3.709	-	-
137	5.349	-	-
138	6.408	-	-
139	6.009	-	-
140	5.16	-	-
141	7.095	-	-
142	7.455	-	-
143	6.051	-	-
144	7.367	-	-
145	8.048	-	-
146	4.692	-	-
147	9.606	-	-
148	4.398	-	-
149	2.798	-	-
150	4.042	-	-
151	2.798	-	-
152	5.991	-	-
153	3.22	-	-
154	3.904	-	-
155	5.848	-	-
156	4.821	-	-
157	5.885	-	-
158	6.009	-	-
159	6.702	-	-
160	3.504	-	-
161	10.731	-	-
162	9.781	-	-
163	10.339	-	-
164	7.546	-	-
165	6.382	-	-
166	4.624	-	-
167	5.144	-	-
168	5.589	-	-
169	5.885	-	-
170	7.08	-	-
171	4.568	-	-
172	3.318	-	-
173	7.13	-	-
174	5.885	-	-
175	5.082	-	-
176	5.044	-	-
177	4.512	-	-
178	4.526	-	-
179	2.675	-	-
180	2.88	-	-
181	4.512	-	-
182	4.36	-	-
183	5.597	-	-
184	6.506	-	-
185	6.548	-	-
186	4.942	-	-
187	4.166	-	-
188	6.22	-	-
189	4.568	-	-
190	4.696	-	-
191	3.915	-	-
192	6.431	-	-
193	3.709	-	-
194	2.273	-	-
195	5.54	-	-
196	6.74	-	-
197	10.388	-	-
198	2.91	-	-
199	11.08	-	-
200	3.059	-	-
201	4.75	-	-
202	4.196	-	-
203	7.489	-	-
204	4.326	-	-
205	3.324	-	-
206	8.119	-	-
207	5.691	-	-
208	4.737	-	-
209	4.296	-	-
210	1.484	-	-
211	5.156	-	-
212	4.732	-	-
213	3.449	-	-
214	5.467	-	-
215	4.281	-	-
216	11.971	-	-
217	7.481	-	-
218	3.449	-	-
219	5.082	-	-
220	4.799	-	-
221	8.732	-	-
222	3.882	-	-
223	4.141	-	-
224	8.971	-	-
225	5.761	-	-
226	3.498	-	-
227	4.803	-	-
228	3.995	-	-
229	3.904	-	-
230	3.375	-	-
231	7.095	-	-
232	3.709	-	-
233	4.568	-	-
234	3.504	-	-
235	7.613	-	-
236	7.509	-	-
237	6.642	-	-
238	7.08	-	-
239	2.578	-	-
240	3.324	-	-
241	7.274	-	-
242	5.691	-	-
243	6.431	-	-
244	5.144	-	-
245	6.441	-	-
246	6.995	-	-
247	5.798	-	-
248	6.677	-	-
249	4.084	-	-
250	2.683	-	-
251	2.967	-	-
252	5.661	-	-
253	6.227	-	-
254	7.886	-	-
255	4.75	-	-
256	6.009	-	-
257	5.559	-	-
258	5.061	-	-
259	7.038	-	-
260	6.401	-	-
261	3.059	-	-
262	4.665	-	-
263	5.209	-	-
264	5.924	-	-
265	5.144	-	-
266	4.166	-	-
267	4.665	-	-
268	4.326	-	-
269	6.995	-	-
270	8.446	-	-
271	4.12	-	-
272	4.321	-	-
273	3.915	-	-
274	6.431	-	-
275	3.844	-	-
276	4.786	-	-
277	5.385	-	-
278	4.799	-	-
279	4.601	-	-
280	6.355	-	-
281	4.947	-	-
282	4.526	-	-
283	1.38	-	-
284	2.503	-	-
285	5.144	-	-
286	3.492	-	-
287	3.349	-	-
288	10.398	-	-
289	7.095	-	-
290	6.298	-	-
291	5.29	-	-
292	5.193	-	-
293	4.737	-	-
294	5.246	-	-
295	4.878	-	-
296	7.821	-	-
297	6.815	-	-
298	7.418	-	-
299	3.794	-	-
300	3.449	-	-
301	2.478	-	-
302	6.565	-	-
303	5.924	-	-
304	10.766	-	-
305	6.913	-	-
306	8.838	-	-
307	8.654	-	-
308	4.803	-	-
309	4.972	-	-
310	6.642	-	-
311	7.548	-	-
312	4.981	-	-
313	5.082	-	-
314	7.59	-	-
315	6.635	-	-
316	4.34	-	-
317	13.068	-	-
318	8.673	-	-
319	7.886	-	-
320	4.531	-	-
321	3.318	-	-
322	5.144	-	-
323	6.298	-	-
324	3.253	-	-
325	1.252	-	-
326	4.141	-	-
327	4.281	-	-
328	4.12	-	-
329	6.268	-	-
330	9.201	-	-
331	3.147	-	-
332	3.709	-	-
333	6.298	-	-
334	4.816	-	-
335	8.575	-	-
336	5.935	-	-
337	4.878	-	-
338	5.31	-	-
339	9.989	-	-
340	5.193	-	-
341	3.504	-	-
342	3.958	-	-
343	3.709	-	-
344	9.705	-	-
345	7.704	-	-
346	5.209	-	-
347	5.97	-	-
348	4.34	-	-
349	4.34	-	-
350	6.749	-	-
351	4.955	-	-
352	5.349	-	-
353	5.365	-	-
354	4.624	-	-
355	5.349	-	-
Figure 3C	Raw data				Statistical analysis: Normality test for donor 1
TNT length for Donor 1	Thin	Thick				Thin	Thick Siglec-	Thick Siglec+
TNT#	Siglec-1 -	Siglec-1-	Siglec-1+		D'Agostino & Pearson test
1	9.213	6.382	38.669		K2	45.3	12.17	40.55
2	12.02	5.401	30.623		P value	<0,0001	0.0023	<0,0001
3	4.084	18.506	19.518		Passed normality test (alpha=0.05)?	No	No	No
4	2.118	37.499	53.702		P value summary	****	**	****
5	2.924	46.066	33.135
6	2.683	10.999
7	3.214	8.395	32.953		Statistical analysis: t test
8	1.301	39.281	31.476		Mann Whitney test
9	2.798	11.729	16.949			Thin vs thick siglec-	Thin vs thick siglec+	Thick Siglec- vs +
10	3.882	16.568	23.228		P value	<0,0001	<0,0001	<0,0001
11	3.324	12.783	28.653		Exact or approximate P value?	Exact	Exact	Exact
12	3.406	19.459	43.417		P value summary	****	****	****
13	5.246	24.758	45.619		Significantly different (P < 0.05)?	Yes	Yes	Yes
14	13.604	29.732	28.242		One- or two-tailed P value?	Two-tailed	Two-tailed	Two-tailed
15	3.593	7.107	27.807		Sum of ranks in column A,B	37957 , 9321	36876 , 11953	955 , 2048
16	3.909	15.848	36.417		Mann-Whitney U	1101	19.5	289
17	5.765	20.518	44.32
18	4.512	14.404	16.827		Difference between medians
19	4.696	26.561	25.406		Median of column A	5,082, n=271	5,082, n=271	15,36, n=36
20	5.65	10.515	13.537		Median of column B	15,36, n=36	30,62, n=41	30,62, n=41
21	4.786	8.558	21.581		Difference: Actual	10.27	25.54	15.27
22	3.375	26.826	46.6		Difference: Hodges-Lehmann	9.836	24.63	14.4
23	3.726	12.977	16.081
24	6.727	22.75	8.753
25	4.432	18.785	21.969
26	6.079	37.562	36.488
27	5.467	16.737	63.909
28	4.554	2.946	25.32
29	4.942	2.866	127.331
30	2.026	14.862	23.373
31	3.253	4.601	60.456
32	3.599	57.637	44.449
33	4.451	18.764	30.931
34	3.931	11.322	56.957
35	4.601	5.999	38.913
36	8.683	8.575	20.19
37	6.391		65.512
38	4.403		43.693
39	5.765		15.568
40	6.22		17.245
41	3.777		27.331
42	4.891		23.025
43	6.355
44	8.734
45	4.692
46	7.023
47	4.545
48	3.349
49	7.489
50	8.443
51	8.753
52	3.709
53	5.349
54	6.408
55	6.009
56	5.16
57	7.095
58	7.455
59	6.051
60	7.367
61	8.048
62	4.692
63	9.606
64	4.398
65	2.798
66	4.042
67	2.798
68	5.991
69	3.22
70	3.904
71	5.848
72	4.821
73	5.885
74	6.009
75	6.702
76	3.504
77	10.731
78	9.781
79	10.339
80	7.546
81	6.382
82	4.624
83	5.144
84	5.589
85	5.885
86	7.08
87	4.568
88	3.318
89	7.13
90	5.885
91	5.082
92	5.044
93	4.512
94	4.526
95	2.675
96	2.88
97	4.512
98	4.36
99	5.597
100	6.506
101	6.548
102	4.942
103	4.166
104	6.22
105	4.568
106	4.696
107	3.915
108	6.431
109	3.709
110	2.273
111	5.54
112	6.74
113	10.388
114	2.91
115	11.08
116	3.059
117	4.75
118	4.196
119	7.489
120	4.326
121	3.324
122	8.119
123	5.691
124	4.737
125	4.296
126	1.484
127	5.156
128	4.732
129	3.449
130	5.467
131	4.281
132	11.971
133	7.481
134	3.449
135	5.082
136	4.799
137	8.732
138	3.882
139	4.141
140	8.971
141	5.761
142	3.498
143	4.803
144	3.995
145	3.904
146	3.375
147	7.095
148	3.709
149	4.568
150	3.504
151	7.613
152	7.509
153	6.642
154	7.08
155	2.578
156	3.324
157	7.274
158	5.691
159	6.431
160	5.144
161	6.441
162	6.995
163	5.798
164	6.677
165	4.084
166	2.683
167	2.967
168	5.661
169	6.227
170	7.886
171	4.75
172	6.009
173	5.559
174	5.061
175	7.038
176	6.401
177	3.059
178	4.665
179	5.209
180	5.924
181	5.144
182	4.166
183	4.665
184	4.326
185	6.995
186	8.446
187	4.12
188	4.321
189	3.915
190	6.431
191	3.844
192	4.786
193	5.385
194	4.799
195	4.601
196	6.355
197	4.947
198	4.526
199	1.38
200	2.503
201	5.144
202	3.492
203	3.349
204	10.398
205	7.095
206	6.298
207	5.29
208	5.193
209	4.737
210	5.246
211	4.878
212	7.821
213	6.815
214	7.418
215	3.794
216	3.449
217	2.478
218	6.565
219	5.924
220	10.766
221	6.913
222	8.838
223	8.654
224	4.803
225	4.972
226	6.642
227	7.548
228	4.981
229	5.082
230	7.59
231	6.635
232	4.34
233	13.068
234	8.673
235	7.886
236	4.531
237	3.318
238	5.144
239	6.298
240	3.253
241	1.252
242	4.141
243	4.281
244	4.12
245	6.268
246	9.201
247	3.147
248	3.709
249	6.298
250	4.816
251	8.575
252	5.935
253	4.878
254	5.31
255	9.989
256	5.193
257	3.504
258	3.958
259	3.709
260	9.705
261	7.704
262	5.209
263	5.97
264	4.34
265	4.34
266	6.749
267	4.955
268	5.349
269	5.365
270	4.624
271	5.349
Figure 3E	Raw data
HIV+ TNT
	HIV-				HIV+
Siglec-1-	37	24	64	76	2	1	0	0
Siglec-1+	66	80	60	59	35	41	34	30
Raw data used for the represented average
Donor #	Spot #	Total cell#	#HIV+ TNT	#HIV+ Siglec-1+	#Siglec1+ TNT	Total TNT#	Siglec-	Siglec- - HIV+		Donor	% HIV+ Siglec-1+ on total TNT	%HIV+ on total TNT	%Siglec-1+ on total TNT	%HIV+ in Siglec-1+TNT
698	1	102	5	5	10	12	2	0		698	0.339806	0.359223	0.640777	0.560606
	2	100	3	3	5	8	3	0		779	0.368421	0.368421	0.701754	0.525
	3	129	0	0	4	7	3	0		566	0.359649	0.274194	0.483871	0.566667
	4	130	2	2	5	7	2	0		554	0.222222	0.222222	0.437037	0.508475
	5	148	1	1	6	10	4	0
	6	107	6	6	8	14	6	0		Average	0.322525	0.306015	0.56586	0.540187
	7	91	5	5	10	15	5	0
	8	143	7	5	9	16	7	2
	9	156	8	8	9	14	5	0
Sum		1106	37	35	66	103	37	2
779	1	68	1	1	7	9	2	0
	2	68	3	3	7	9	2	0			Statistical analysis:
	3	66	0	0	6	12	6	0			we compared the %of HIV+ Siglec-1+ TNT vs HIV+ Siglec-1- TNT
	4	81	6	5	10	12	2	1			data were not distributed according to Normal law so we used Wilcoxon matched-pairs signed rank test
	5	76	3	3	7	11	4	0
	6	71	8	8	12	14	2	0
	7	80	4	4	5	9	4	0
	8	72	4	4	9	9	0	0			Wilcoxon matched-pairs signed rank test
	9	80	5	5	9	11	2	0			P value	<0,0001
	10	65	5	5	4	9	5	0			Exact or approximate P value?	Exact
	11	59	3	3	4	9	5	0			P value summary	****
sum		786	42	41	80	114	34	1			Significantly different (P < 0.05)?	Yes
566	1	145	3	3	6	14	8	0			One- or two-tailed P value?	Two-tailed
	2	136	5	5	7	13	6	0			Sum of positive, negative ranks	526,5 , -1,500
	3	121	5	5	9	16	7	0			Sum of signed ranks (W)	525
	4	97	8	8	8	16	8	0			Number of pairs	35
	5	153	2	2	10	21	11	0			Number of ties (ignored)	3
	6	112	2	2	7	16	9	0
	7	130	5	5	7	13	6	0			Median of differences
	8	157	4	4	6	15	9	0			Median	4
Sum		1051	34	34	60	124	64	0
554	1	193	1	1	7	25	18	0			How effective was the pairing?
	2	160	3	3	6	16	10	0			rs (Spearman)	-0.3461
	3	169	3	3	8	14	6	0			P value (one tailed)	0.0209
	4	122	4	4	6	14	8	0			P value summary	*
	5	145	6	6	8	23	15	0			Was the pairing significantly effective?	Yes
	6	176	7	7	12	21	9	0
	7	157	6	6	12	22	10	0
Sum		1122	30	30	59	135	76	0
											Normality test:
											D'Agostino & Pearson test
											K2	67.14	0.2173
											P value	<0,0001	0.897
											Passed normality test (alpha=0.05)?	No	Yes
											P value summary	****	ns
											Kolmogorov-Smirnov test
											KS distance	0.5336	0.1368
											P value	<0,0001	0.0953
											Passed normality test (alpha=0.05)?	No	Yes
											P value summary	****	ns
