# Supplementary material for: Tuberculosis-associated IFN-I induces Siglec-1 on tunneling nanotubes and favors HIV-1 spread in macrophages
Source: eLife. 2020 Mar 30;9:e52535. doi: 10.7554/eLife.52535 (PMC7173963; doi:10.7554/eLife.52535)
Supplement: Figure 4—figure supplement 1—source data 1. [file elife-52535-fig4-figsupp1-data1.xlsx]

## Sheet: Feuil1
Figure S4A	Raw data				Descriptive statistics				Statistic test
MFI Siglec-1 after siRNA						siCtrl	siSiglec-1		Wilcoxon matched-pairs signed rank test
Donor#	siCtrl	siSiglec-1			Number of values	12	12		P value	0.0005
29	1838	1023							Exact or approximate P value?	Exact
61	2006	885			Minimum	221	151		P value summary	***
646	655	255			25% Percentile	508.8	227.8		Significantly different (P < 0.05)?	Yes
433	659	221			Median	657	294		One- or two-tailed P value?	Two-tailed
94	1092	1011			75% Percentile	1231	785.5		Sum of positive, negative ranks	78,00 , 0,000
157	931	263			Maximum	2006	1023		Sum of signed ranks (W)	78
862	1277	487							Number of pairs	12
458	606	325			Mean	893.9	451.9		Number of ties (ignored)	0
328	507	165			Std. Deviation	562.5	328.9
817	221	151			Std. Error of Mean	162.4	94.94		Median of differences
29	514	389							Median	371
677	421	248			Lower 95% CI of mean	536.5	243
					Upper 95% CI of mean	1251	660.9		How effective was the pairing?
									rs (Spearman)	0.8042
					Sum	10727	5423		P value (one tailed)	0.0013
									P value summary	**
					D'Agostino & Pearson test				Was the pairing significantly effective?	Yes
					K2	1.153	4.976
					P value	0.5619	0.0831
					Passed normality test (alpha=0.05)?	Yes	Yes
					P value summary	ns	ns
					Kolmogorov-Smirnov test
					KS distance	0.1342	0.142
					P value	>0,1000	>0,1000
					Passed normality test (alpha=0.05)?	Yes	Yes
					P value summary	ns	ns
Figure S4B	Raw data				Descriptive statistics				Statistic test
%cells with TNT						siCTL	siCD169		Wilcoxon matched-pairs signed rank test
Donor#	siCtrl	siSiglec-1			Number of values	6	6		P value	0.8438
470	38	32							Exact or approximate P value?	Exact
881	14	15			Minimum	12	15		P value summary	ns
157	18	22			25% Percentile	13.5	17.25		Significantly different (P < 0.05)?	No
862	24	19			Median	21	20.5		One- or two-tailed P value?	Two-tailed
298	28	24			75% Percentile	30.5	26		Sum of positive, negative ranks	9,000 , -12,00
458	12	18			Maximum	38	32		Sum of signed ranks (W)	-3
					Range	26	17		Number of pairs	6
									Number of ties (ignored)	0
					Mean	22.33	21.67
					Std. Deviation	9.75	5.955		Median of differences
					Std. Error of Mean	3.981	2.431		Median	-1.5
					Lower 95% CI of mean	12.1	15.42		How effective was the pairing?
					Upper 95% CI of mean	32.57	27.92		rs (Spearman)	0.8857
									P value (one tailed)	0.0167
					Geometric mean	20.64	21.04		P value summary	*
					Geometric SD factor	1.547	1.3		Was the pairing significantly effective?	Yes
					D'Agostino & Pearson test
					K2	N too small	N too small
					P value
					Passed normality test (alpha=0.05)?
					P value summary
					Kolmogorov-Smirnov test
					KS distance	0.1716	0.1809
					P value	>0,1000	>0,1000
					Passed normality test (alpha=0.05)?	Yes	Yes
					P value summary	ns	ns
					We assumed non-normal distribution
Figure S4D	Raw data				Descriptive statistics				Statistic test
MFI GFP VLP						siCtrl	siSiglec-1		Wilcoxon matched-pairs signed rank test
Donor#	siCtrl	siSiglec-1			Number of values	6	6		P value	0.0313
667	1287	206							Exact or approximate P value?	Exact
824	1145	227			Minimum	232	133		P value summary	*
D1	439	189			25% Percentile	387.3	175		Significantly different (P < 0.05)?	Yes
D2	503	307			Median	782.5	215		One- or two-tailed P value?	Two-tailed
15	1062	224			75% Percentile	1181	247		Sum of positive, negative ranks	0,000 , -21,00
629	232	133			Maximum	1287	307		Sum of signed ranks (W)	-21
					Range	1055	174		Number of pairs	6
									Number of ties (ignored)	0
					Mean	778	214.3
					Std. Deviation	438.9	56.86		Median of differences
					Std. Error of Mean	179.2	23.21		Median	-544
					Lower 95% CI of mean	317.4	154.7		How effective was the pairing?
					Upper 95% CI of mean	1239	274		rs (Spearman)	0.4857
									P value (one tailed)	0.1778
					Geometric mean	656.7	207.9		P value summary	ns
					Geometric SD factor	1.973	1.315		Was the pairing significantly effective?	No
					D'Agostino & Pearson test
					K2	N too small	N too small
					P value
					Passed normality test (alpha=0.05)?
					P value summary
					Kolmogorov-Smirnov test
					KS distance	0.2412	0.2452
					P value	>0,1000	>0,1000
					Passed normality test (alpha=0.05)?	Yes	Yes
					P value summary	ns	ns
					We assumed non-normal distribution
Figure S4E	Raw data
%GFP VLP uptake with blocking Ab					Descriptive stats				Statistical test
Donor#	cmMTB	a-IgG	a-Siglec-1						Wilcoxon matched-pairs signed rank test
						CmMTB	a-IgG	a-Siglec-1		cmMTB vs a-IgG	cmMTB vs a-Siglec-1	aIgG vs aSiglec-1
					Number of values	6	6	6	P value	0.5625	0.0313	0.0313
									Exact or approximate P value?	Exact	Exact	Exact
					Minimum	26.58	13.76	0.69	P value summary	ns	*	*
					25% Percentile	26.79	23.26	0.75	Significantly different (P < 0.05)?	No	Yes	Yes
					Median	35.76	36.33	1.46	One- or two-tailed P value?	Two-tailed	Two-tailed	Two-tailed
					75% Percentile	57.09	53.66	1.913	Sum of positive, negative ranks	7,000 , -14,00	0,000 , -21,00	0,000 , -21,00
					Maximum	58.24	61.5	2.04	Sum of signed ranks (W)	-7	-21	-21
					Range	31.66	47.74	1.35	Number of pairs	6	6	6
									Number of ties (ignored)	0	0	0
					Mean	39.98	37.57	1.382
					Std. Deviation	14.48	17.14	0.5624	Median of differences
					Std. Error of Mean	5.913	6.998	0.2296	Median	-2.75	-34.08	-35.33
					Lower 95% CI of mean	24.78	19.58	0.7914	How effective was the pairing?
					Upper 95% CI of mean	55.18	55.55	1.972	rs (Spearman)	0.7714	0.6	0.3143
									P value (one tailed)	0.0514	0.1208	0.2819
					Geometric mean	37.89	33.81	1.274	P value summary	ns	ns	ns
					Geometric SD factor	1.43	1.704	1.583	Was the pairing significantly effective?	No	No	No
					D'Agostino & Pearson test
					K2	N too small	N too small	N too small
					P value
					Passed normality test (alpha=0.05)?
					P value summary
					Kolmogorov-Smirnov test
					KS distance	0.2363	0.1199	0.1949
					P value	>0,1000	>0,1000	>0,1000
					Passed normality test (alpha=0.05)?	Yes	Yes	Yes
					P value summary	ns	ns	ns
					We assumed non-normal distribution
Figure S4G	Raw data
%of infection for transfer experiments					Descriptive stats				Statistical test
Donor#	siCtrl	siSiglec-1				siCtrl	siSiglec-1
396	16	21			Number of values	4	4		Wilcoxon matched-pairs signed rank test
718	24	29							P value	0.125
67	8	12			Minimum	6	12		Exact or approximate P value?	Exact
923	6	15			25% Percentile	6.5	12.75		P value summary	ns
					Median	12	18		Significantly different (P < 0.05)?	No
					75% Percentile	22	27		One- or two-tailed P value?	Two-tailed
					Maximum	24	29		Sum of positive, negative ranks	10,00 , 0,000
					Range	18	17		Sum of signed ranks (W)	10
									Number of pairs	4
					Mean	13.5	19.25		Number of ties (ignored)	0
					Std. Deviation	8.226	7.5
					Std. Error of Mean	4.113	3.75		Median of differences
									Median	5
					Lower 95% CI of mean	0.4106	7.316
					Upper 95% CI of mean	26.59	31.18		How effective was the pairing?
									rs (Spearman)	0.8
					Geometric mean	11.65	18.2		P value (one tailed)	0.1667
					Geometric SD factor	1.885	1.472		P value summary	ns
									Was the pairing significantly effective?	No
					D'Agostino & Pearson test
					K2	N too small	N too small
					P value
					Passed normality test (alpha=0.05)?
					P value summary
					Kolmogorov-Smirnov test
					KS distance	N too small	N too small
					P value
					Passed normality test (alpha=0.05)?
					P value summary
