# Supplementary material for: Tuberculosis-associated IFN-I induces Siglec-1 on tunneling nanotubes and favors HIV-1 spread in macrophages
Source: eLife. 2020 Mar 30;9:e52535. doi: 10.7554/eLife.52535 (PMC7173963; doi:10.7554/eLife.52535)
Supplement: Figure 4—source data 1. [file elife-52535-fig4-data1.xlsx]

## Sheet: Feuil1
Figure 4B	Raw data			Column statistic (descriptive)				Normality test
%cells with thick TNT					siCtrl	siSiglec-1		Kolmogorov-Smirnov test
Donor#	siCtrl	siSiglec-1		Number of values	5	5		KS distance	0.2173	0.2113
458	3.4	2.4						P value	>0,1000	>0,1000
98	8.9	6.7		Minimum	3.4	2.4		Passed normality test (alpha=0.05)?	Yes	Yes
132	9.6	4.6		25% Percentile	6.15	3.5		P value summary	ns	ns
955	16.5	13.8		Median	9.6	6.7
615	11	12.3		75% Percentile	13.75	13.05		Paired t test
				Maximum	16.5	13.8		P value	0.1369
				Range	13.1	11.4		P value summary	ns
								Significantly different (P < 0.05)?	No
				Mean	9.88	7.96		One- or two-tailed P value?	Two-tailed
				Std. Deviation	4.693	4.918		t, df	t=1,857, df=4
				Std. Error of Mean	2.099	2.199		Number of pairs	5
				Lower 95% CI of mean	4.053	1.854		How big is the difference?
				Upper 95% CI of mean	15.71	14.07		Mean of differences	-1.92
								SD of differences	2.312
				Geometric mean	8.798	6.603		SEM of differences	1.034
				Geometric SD factor	1.79	2.059		95% confidence interval	-4,791 to 0,9512
								R squared (partial eta squared)	0.4629
								How effective was the pairing?
Figure 4C	Raw data							Correlation coefficient (r)	0.8853
TNT length after gene silencing								P value (one tailed)	0.0229
								P value summary	*
								Was the pairing significantly effective?	Yes
siCtrl	82.618	27.908	81.189	29.064	27.512	120.609	37.352	96.379	51.124	61.967	81.827	21.989	68.231	34.651	40.707	43.53	50.133	56.459	57.304	23.068	104.603	55.346	88.961	40.242	69.596	42.993	38.319	104.235	53.095	39.102	58.074	80.334	66.217	113.723	90.216	44.316	26.318	68.822	70.056	58.795	142.012	68.685	47.531	41.369	40.546	63.599	32.334	103.032	52.68
siSiglec-1	22.659	22.114	33.481	38.136	45.699	19.117	53.865	31.95	19.78	22.904	64.282	18.093	18.291	60.17	24.359	36.708	27.981	30.442	51.951	28.022	25.013	55.085	23.78	50.612	39.196	33.453	106.821	49.381	51.251	51.067	9.171	60.117	55.669	34.56	25.546	73.479	24.105	80.977	11.427	75.569	19.873	20.91	10.702	21.988	58.42	49.726	66.429	20.732	10.427
				Descriptive statistics
					siCtrl	siSiglec-1		Mann Whitney test
				Number of values	661	476		P value	<0,0001
								Exact or approximate P value?	Approximate
				Minimum	9.171	5.824		P value summary	****
				25% Percentile	41.07	22.72		Significantly different (P < 0.05)?	Yes
				Median	59.41	33.47		One- or two-tailed P value?	Two-tailed
				75% Percentile	88.92	55.09		Sum of ranks in column A,B	452092 , 194861
				Maximum	251	232.7		Mann-Whitney U	81335
				Range	241.9	226.9
								Difference between medians
				Mean	68.99	42.1		Median of column A	59,41, n=661
				Std. Deviation	38.08	28.85		Median of column B	33,47, n=476
				Std. Error of Mean	1.481	1.322		Difference: Actual	-25.94
								Difference: Hodges-Lehmann	-23.56
				Lower 95% CI of mean	66.09	39.5
				Upper 95% CI of mean	71.9	44.69
				Geometric mean	59.61	34.5
				Geometric SD factor	1.736	1.883
				Distribution
				D'Agostino & Pearson test
				K2	143.1	221.5
				P value	<0,0001	<0,0001
				Passed normality test (alpha=0.05)?	No	No
				P value summary	****	****
				Kolmogorov-Smirnov test
				KS distance	0.1095	0.1416
				P value	<0,0001	<0,0001
				Passed normality test (alpha=0.05)?	No	No
				P value summary	****	****
Figure 4D	Raw data
HIV transfer				Statistical analysis: descriptive				Statistical analysis: t test
Donor#	siCtrl	siSiglec-1			siCtrl	siSiglec-1
881	5.2	0.9		Number of values	6	6		Wilcoxon matched-pairs signed rank test
470	9.9	3.5						P value	0.0313
67	14.6	8.2		Minimum	5.2	0.9		Exact or approximate P value?	Exact
923	8.8	2.2		25% Percentile	7.9	1.875		P value summary	*
396	30.9	14.7		Median	12.25	5.85		Significantly different (P < 0.05)?	Yes
718	36.5	21.4		75% Percentile	32.3	16.38		One- or two-tailed P value?	Two-tailed
				Maximum	36.5	21.4		Sum of positive, negative ranks	0,000 , -21,00
				Range	31.3	20.5		Sum of signed ranks (W)	-21
								Number of pairs	6
				Mean	17.65	8.483		Number of ties (ignored)	0
				Std. Deviation	12.91	8.092
				Std. Error of Mean	5.271	3.303		Median of differences
								Median	-6.5
				Lower 95% CI of mean	4.1	-0.008518
				Upper 95% CI of mean	31.2	16.98		How effective was the pairing?
								rs (Spearman)	1
				Geometric mean	13.98	5.113		P value (one tailed)	0.0014
				Geometric SD factor	2.131	3.337		P value summary	**
								Was the pairing significantly effective?	Yes
				D'Agostino & Pearson test
				K2	N too small	N too small
				P value
				Passed normality test (alpha=0.05)?
				P value summary
				Kolmogorov-Smirnov test
				KS distance	0.26	0.231
				P value	>0,1000	>0,1000
				Passed normality test (alpha=0.05)?	Yes	Yes
				P value summary	ns	ns
Figure 4E	Raw data
Mitochondria transfer				Statistical analysis: descriptive				Normality test				Statistical analysis: t test
	siCtrl	siSiglec-1			siCtrl	siSiglec-1
824	21	29		Number of values	6	6		D'Agostino & Pearson test				Wilcoxon matched-pairs signed rank test
667	32.1	27						K2	N too small	N too small		P value	0.0938
186	44	23		Minimum	21	19.88		P value				Exact or approximate P value?	Exact
DXX	34	21		25% Percentile	28.04	20.72		Passed normality test (alpha=0.05)?				P value summary	ns
D1	30.39	19.88		Median	33.05	25		P value summary				Significantly different (P < 0.05)?	No
D2	35.92	27.5		75% Percentile	37.94	27.88						One- or two-tailed P value?	Two-tailed
				Maximum	44	29						Sum of positive, negative ranks	2,000 , -19,00
				Range	23	9.12						Sum of signed ranks (W)	-17
												Number of pairs	6
				Mean	32.9	24.56		Kolmogorov-Smirnov test				Number of ties (ignored)	0
				Std. Deviation	7.511	3.777		KS distance	0.2024	0.2406
				Std. Error of Mean	3.066	1.542		P value	>0,1000	>0,1000		Median of differences
								Passed normality test (alpha=0.05)?	Yes	Yes		Median	-9.465
				Lower 95% CI of mean	25.02	20.6		P value summary	ns	ns
				Upper 95% CI of mean	40.78	28.53
				Geometric mean	32.13	24.32		We assumed non-normal distribution
				Geometric SD factor	1.277	1.169
Figure 4G	Raw data
HIV release ELISA p24				Statistical analysis: descriptive				Statistical analysis: t test
Donor#	siCtrl	siSiglec-1			siCtrl	siSiglec-1		Wilcoxon matched-pairs signed rank test
133	50684.8	48908.5		Number of values	9	9		P value	0.0039
789	44260.4	27355.6						Exact or approximate P value?	Exact
538	144264	16509.6		Minimum	1289	273.8		P value summary	**
157	1288.75	273.77		25% Percentile	5793	2488		Significantly different (P < 0.05)?	Yes
458b	15777	9482		Median	15777	9482		One- or two-tailed P value?	Two-tailed
298b	2864	912		75% Percentile	47473	21933		Sum of positive, negative ranks	0,000 , -45,00
38	10500	9991		Maximum	144264	48909		Sum of signed ranks (W)	-45
101	8721	4375		Range	142975	48635		Number of pairs	9
328	37689	4064						Number of ties (ignored)	0
				Mean	35117	13541
				Std. Deviation	44871	15768		Median of differences
				Std. Error of Mean	14957	5256		Median	-4346
				Lower 95% CI of mean	625.9	1421		How effective was the pairing?
				Upper 95% CI of mean	69607	25661		rs (Spearman)	0.8333
								P value (one tailed)	0.0041
				Geometric mean	15902	5946		P value summary	**
				Geometric SD factor	4.442	5.158		Was the pairing significantly effective?	Yes
				D'Agostino & Pearson test
				K2	14.19	8.047
				P value	0.0008	0.0179
				Passed normality test (alpha=0.05)?	No	No
				P value summary	***	*
Figure 4G2	Raw data
MGC				Statistical analysis: descriptive				Statistical analysis: t test
Donor#	siCtrl	siSiglec-1			siCtrl	siSiglec-1		Paired t test
550	22.1196	3.19372		Number of values	9	9		P value	<0,0001
458	43.1493	16.1606						P value summary	****
955	56.6952	24.6995		Minimum	18.16	1.437		Significantly different (P < 0.05)?	Yes
382	25.9784	14.0895		25% Percentile	24.05	2.733		One- or two-tailed P value?	Two-tailed
26	18.1614	1.43678		Median	40.63	14.09		t, df	t=8,681, df=8
132	81.3433	65.3226		75% Percentile	64.76	37.7		Number of pairs	9
538	31.383	2.27273		Maximum	81.34	65.32
621	40.625	5.23077		Range	63.18	63.89		How big is the difference?
818	72.8261	50.6977						Mean of differences	-23.24
				Mean	43.59	20.34		SD of differences	8.032
				Std. Deviation	22.44	22.99		SEM of differences	2.677
				Std. Error of Mean	7.479	7.662		95% confidence interval	-29,42 to -17,07
								R squared (partial eta squared)	0.904
				Lower 95% CI of mean	26.34	2.677
				Upper 95% CI of mean	60.83	38.01		How effective was the pairing?
								Correlation coefficient (r)	0.9377
				Geometric mean	38.66	10.02		P value (one tailed)	<0,0001
				Geometric SD factor	1.689	3.934		P value summary	****
								Was the pairing significantly effective?	Yes
				D'Agostino & Pearson test
				K2	1.193	3.546
				P value	0.5508	0.1699
				Passed normality test (alpha=0.05)?	Yes	Yes
				P value summary	ns	ns
				Kolmogorov-Smirnov test
				KS distance	0.1744	0.2389
				P value	>0,1000	>0,1000
				Passed normality test (alpha=0.05)?	Yes	Yes
				P value summary	ns	ns
[truncated: 612 more columns]
