# Supplementary material for: A)Study on coupling effects of ship motion and sloshing
Source: eLife journal article supplement (doi:10.7554/elife.52535), 2006-01-01
Supplement: figures [file elife-52535-figures-v2.pdf]

---

## Figures and figure supplements

Tuberculosis-associated IFN-I induces Siglec-1 on tunneling nanotubes and favors HIV-1 spread in macrophages

**Maeva Dupont *et al***

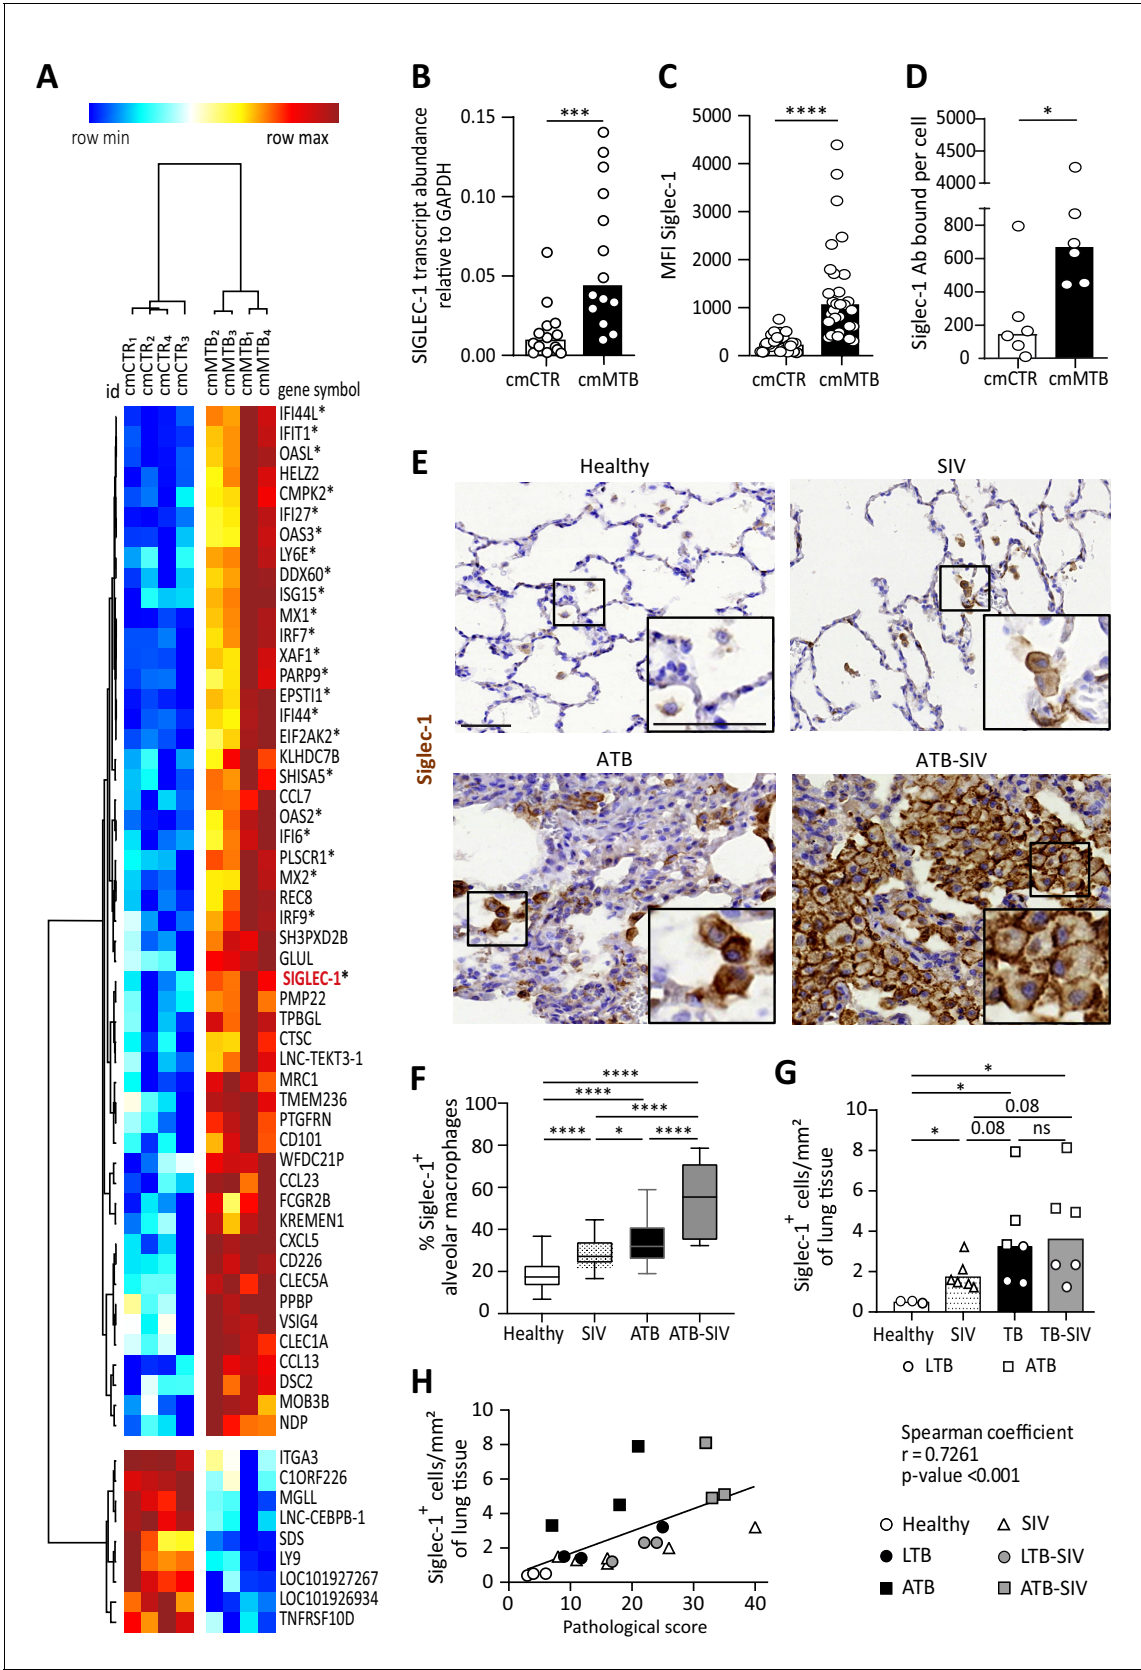

**Figure 1.** Tuberculosis-associated microenvironments induce Siglec-1 expression in macrophages. (A–D) For 3 days, human monocytes were differentiated into macrophages with cmCTR (white) or cmMTB (black) supernatants. (A) Heatmap from a transcriptomic analysis (GEO submission Figure 1 continued on next page

## Figure 1 continued

GSE139511) illustrating the top 60 differentially expressed genes (DEGs) between cmCTR- or cmMTB-cells. Selection of the top DEGs was performed using an adjusted  $p$ -value  $\leq 0.05$ , a fold change of at least 2, and a minimal expression of 6 in a  $\log_2$  scale. Hierarchical clustering was performed using the complete linkage method and the Pearson correlation metric with Morpheus (Broad Institute). Interferon-stimulated genes (ISG) are labelled with an asterisk and Siglec-1 is indicated in red. **(B–D)** Validation of Siglec-1 expression in cmMTB-treated macrophages. Vertical scatter plots showing the relative abundance to mRNA **(B)**, median fluorescent intensity (MFI) **(C)**, and mean number of Siglec-1 antibody binding sites per cell **(D)**. Each circle represents a single donor and histograms median values. **(E)** Representative immunohistochemical images of Siglec-1 staining (brown) in lung biopsies of healthy, SIV infected (SIV), active TB (ATB), and co-infected (ATB-SIV) non-human primates (NHP). Scale bar, 100  $\mu\text{m}$ . Insets are 2x zoom. **(F)** Vertical Box and Whisker plot indicating the distribution of the percentage of Siglec-1<sup>+</sup> alveolar macrophages in lung biopsies from the indicated NHP groups. Quantification analysis from  $n = 800$  alveolar macrophages grouped from three independent animals per NHP group. **(G)** Vertical scatter plots displaying the number of cells that are positive for Siglec-1 per  $\text{mm}^2$  of lung biopsies from the indicated NHP groups. Each symbol represents a single animal per NHP group. **(H)** Correlation between Siglec-1<sup>+</sup> cells per  $\text{mm}^2$  of lung tissue and the pathological score for healthy (white circle), SIV<sup>+</sup> (white triangles), latent (black circle) or active (black square) TB, and SIV<sup>+</sup> with latent (grey circle) or active (grey square) TB. Each symbol represents a single animal per NHP group. Mean value is represented as a black line. Statistical analyses: Two-tailed, Wilcoxon signed-rank test **(B–D)**, Mann-Whitney unpaired test **(F–G)**, Spearman correlation **(H)**. \* $p < 0.05$ , \*\* $p < 0.01$ , \*\*\* $p < 0.001$ , \*\*\*\* $p < 0.0001$ . ns: not significant. See **Figure 1—source data 1**.

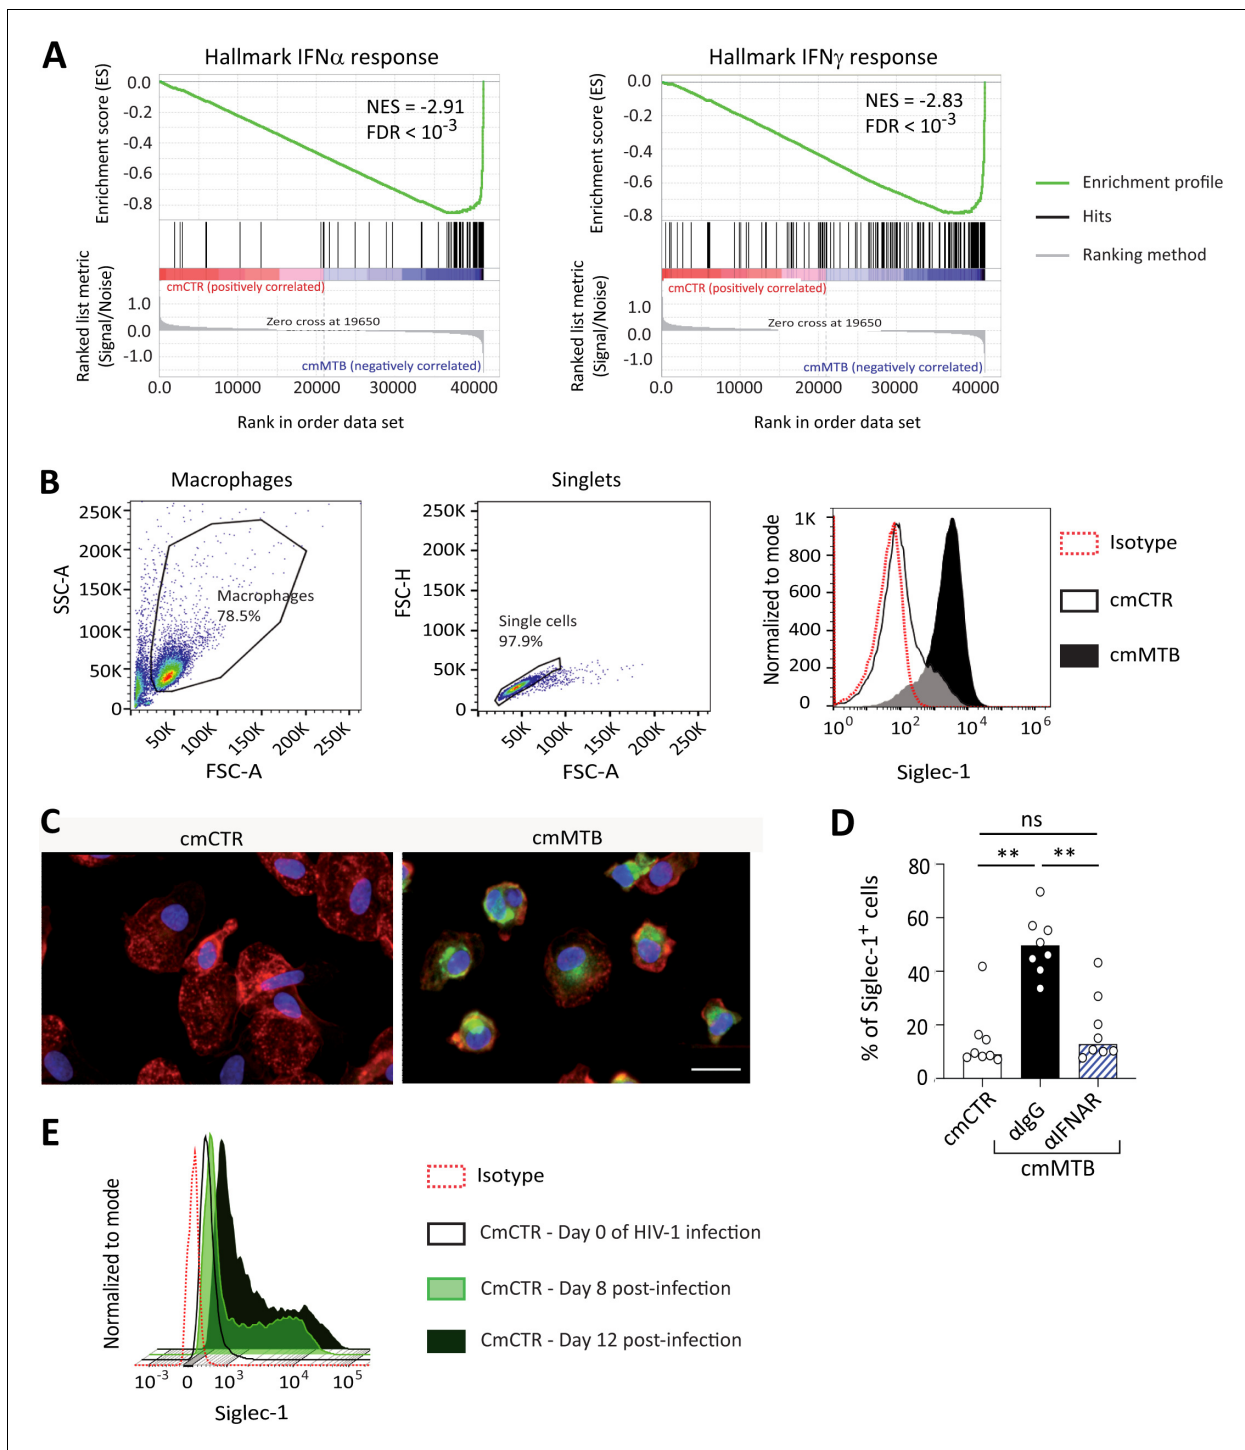

**Figure 1—figure supplement 1.** Tuberculosis-associated microenvironments increase Siglec-1 expression in human macrophages. (A–D) For 3 days, human monocytes were differentiated into macrophages with cmCTR (white) or cmMTB (black) supernatants. (A) (Left) Gene set enrichment plot of the interferon alpha (IFN $\alpha$ ) response (hallmark collection of MSigDB). This plot shows the distribution of the barcode between macrophages exposed to cmCTR (red) versus cmMTB (blue) supernatants. Each bar of the barcode corresponds to a signature gene of the gene set. The skewing to the right indicates enrichment in macrophages exposed to cmMTB versus cmCTR supernatant of genes up-regulated in response to IFN $\alpha$ . (Right) Gene set enrichment plot of the IFN $\gamma$  response (hallmark collection of MSigDB). (B) Flow cytometry gating strategy to assess Siglec-1 cell-surface expression in human macrophages exposed to cmCTR (white) and cmMTB (black). (Left) Based on size (FSC-A) and granularity (SSC-A), a gate was created to separate human macrophages from cell debris and dying cells. Macrophages were then subjected through a second gate based FSC Area and Height Scaling (FSC-A and FSC-H) to separate singlets from doublets. (Right) Based on the singlet gate, the histogram plot illustrates Siglec-1

Figure 1—figure supplement 1 continued on next page



*Figure 1—figure supplement 1 continued*

expression that is higher in cmMTB- (black) than in cmCTR-treated (white) macrophages. (C) Representative immunofluorescence of Siglec-1 intracellular staining (green), actin (red) and nuclei (blue) after 3 days of monocyte conditioning with cmMTB. Scale bar, 10  $\mu$ m. (D) Vertical scatter plot showing the quantification of Siglec-1 intracellular staining in cmCTR- or cmMTB-treated cells in the presence of an IFNAR-2 blocking ( $\alpha$ -IFNAR) or control ( $\alpha$ -IgG) antibodies during cell conditioning. Each circle represents a single donor and histograms median value. (E) Median fluorescence intensity (MFI) of Siglec-1 cell-surface expression in human macrophages exposed to cmCTR and infected with HIV-1 assessed by flow cytometry. The histogram plot illustrates Siglec-1 expression that increases within days post-HIV-1 infection of cmCTR-macrophages. Statistical analyses: Two-tailed, Wilcoxon signed-rank test (D). \* $p < 0.05$ , \*\* $p < 0.01$ , ns: not significant.

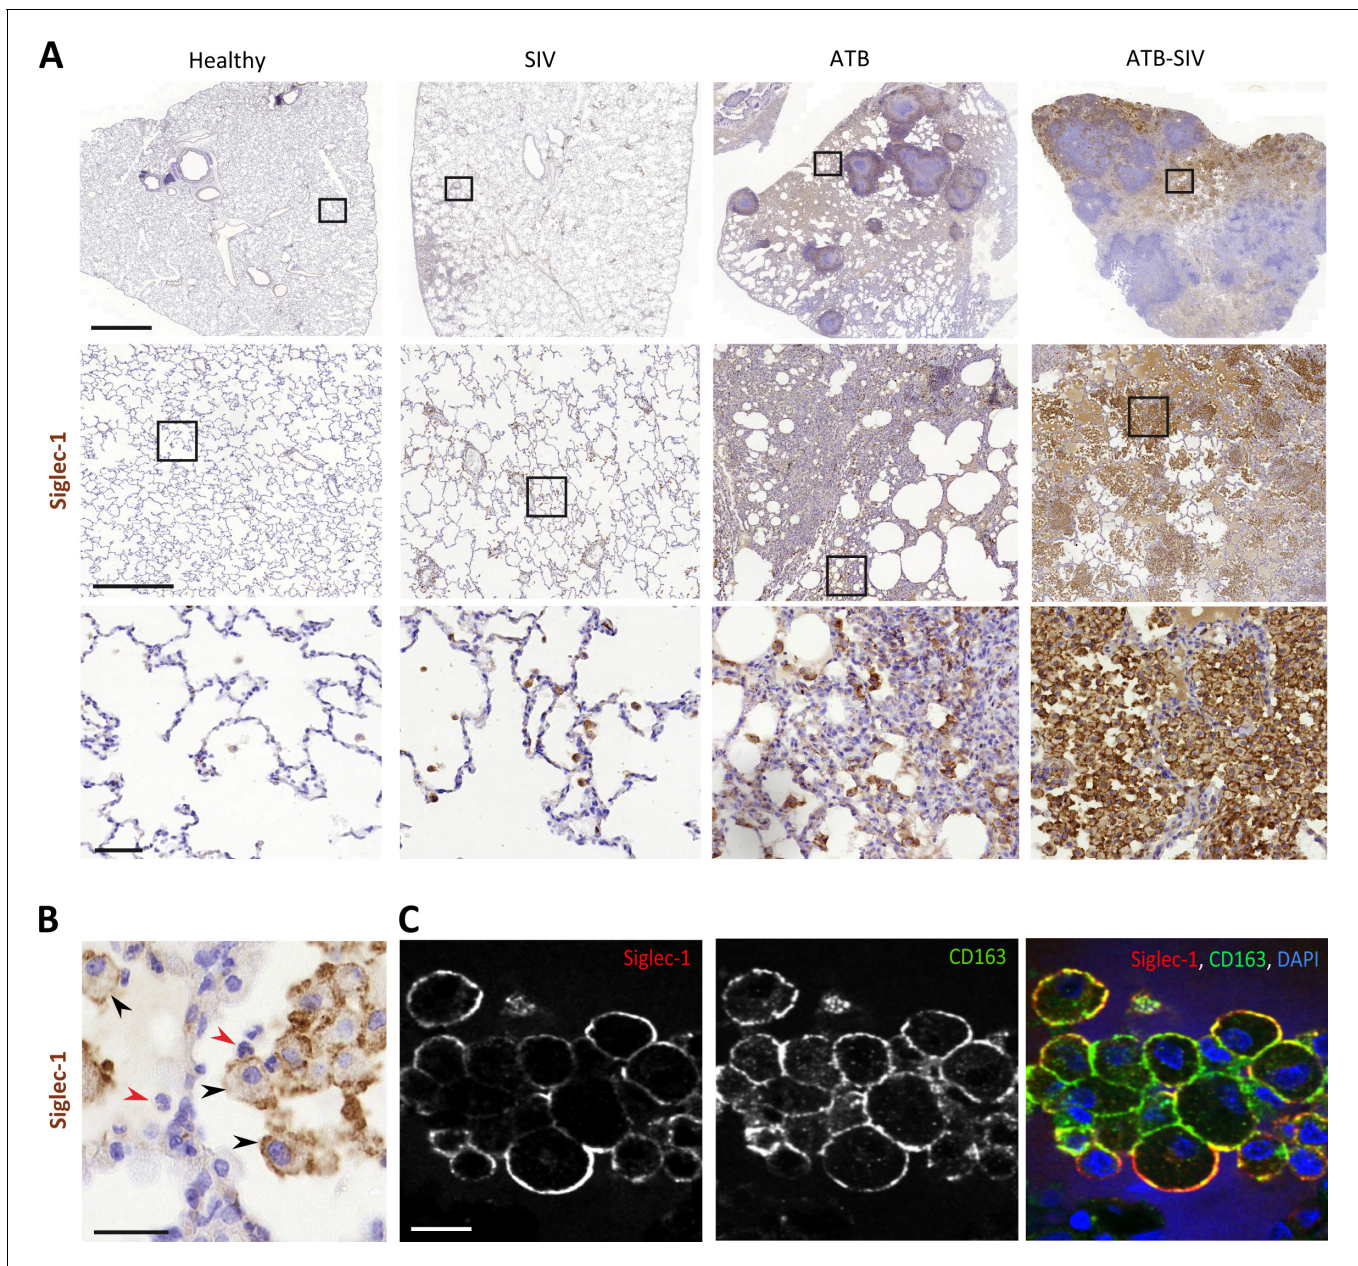

**Figure 1—figure supplement 2.** Tuberculosis-associated microenvironments increase Siglec-1 expression in non-human primate alveolar macrophages. (A) Accumulation of Siglec-1<sup>+</sup> alveolar macrophages in the lung of co-infected non-human primates (NHP). Representative immunohistochemical images of Siglec-1 staining (brown) in lung biopsies of healthy, SIV-infected (SIV), active tuberculosis (ATB) and co-infected with SIV (ATB-SIV) NHP. Scale bars from top to bottom: 2 mm, 500  $\mu$ m and 50  $\mu$ m. (B–C) Siglec-1<sup>+</sup> cells display the alveolar macrophage morphology. (B) Representative immunohistochemistry image from lung biopsy of an ATB-SIV NHP stained for Siglec-1 (brown). Siglec-1<sup>+</sup> cells display a cell morphology with a single nucleus and large cytoplasm reminiscent of macrophage (black arrowhead); Siglec-1<sup>-</sup> cells display a different nucleus morphology and small cytoplasm reminiscent of neutrophils (red arrowhead). Scale bar, 20  $\mu$ m. (C) Representative immunofluorescence images of alveolar macrophages found in lung biopsy of a representative ATB-SIV NHP stained for Siglec-1 (red), CD163 (green) and nuclei (DAPI, blue). Scale bar, 20  $\mu$ m.



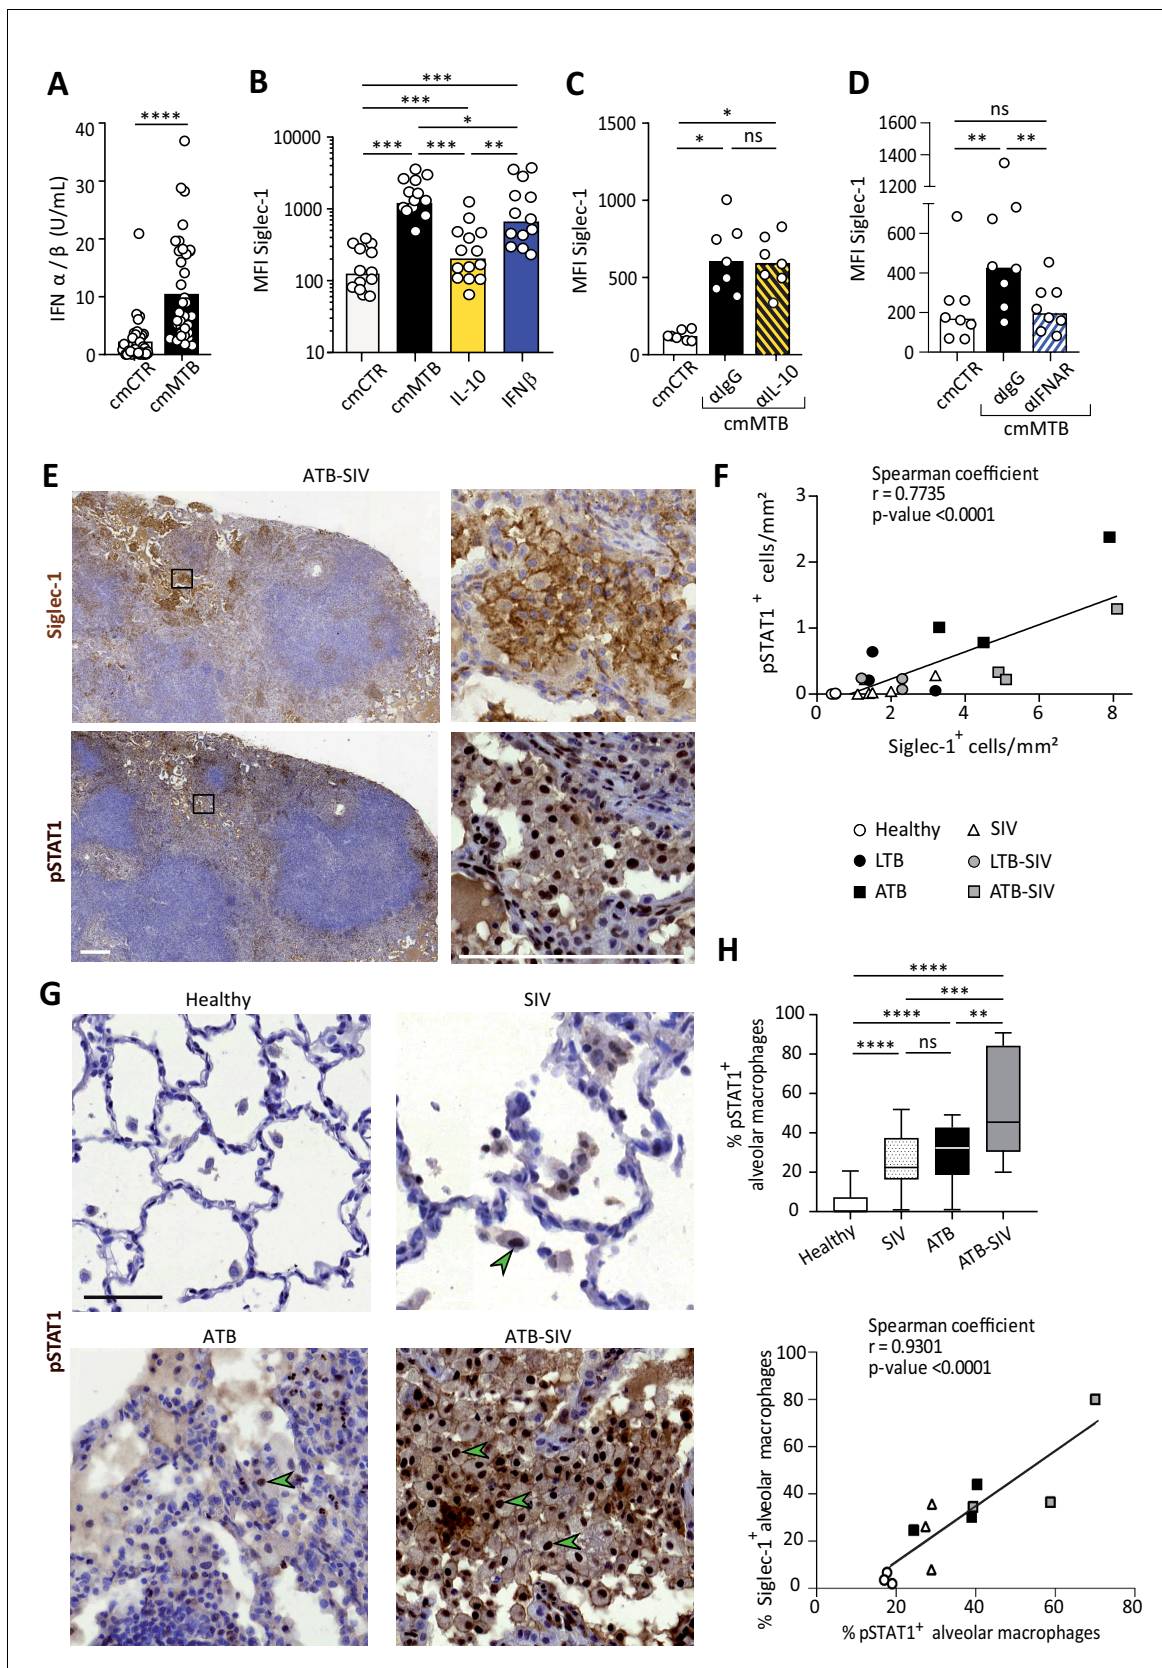

**Figure 2.** Siglec-1 expression is dependent on Mtb-induced type I IFN signaling. (A) Vertical scatter plot showing the relative abundance of IFN-I in cmCTR (white) and cmMTB (black) media, as measured indirectly after 24 hr exposure to the HEK-Blue IFN- $\alpha/\beta$  reporter cell line yielding reporter

Figure 2 continued on next page

*Figure 2 continued*

activity in units (U) per mL. (B–D) Vertical scatter plots displaying the median fluorescent intensity (MFI) of Siglec-1 cell-surface expression after three days of monocyte differentiation into macrophages either with cmMTB (black) or cmCTR (white), the indicated recombinant cytokines (B), the presence of an IL-10 depletion ( $\alpha$ -IL-10) or a control ( $\alpha$ -IgG) antibodies (C), or the presence of an IFNAR-2 blocking ( $\alpha$ -IFNAR) or control ( $\alpha$ -IgG) antibodies (D). (E) Representative serial immunohistochemical images of lung biopsies of a co-infected (ATB-SIV) NHP stained for Siglec-1 (brown, top) and pSTAT1 (brown, bottom). Scale bar, 250  $\mu$ m. Insets are 10x zooms. (F) Correlation of the percentage of cells positive for Siglec-1 and pSTAT1, as measured per mm<sup>2</sup> of lung tissue from the indicated NHP groups. Mean value is represented as a black line. (G) Representative immunohistochemical images of lung biopsies from the indicated NHP group stained for pSTAT1 (brown). Arrowheads show pSTAT1-positive nuclei. Scale bar, 500  $\mu$ m. (H) Upper panel: Vertical Box and Whisker plot illustrating the percentage of pSTAT1<sup>+</sup> alveolar macrophages in lung biopsies from the indicated NHP groups. Quantification analysis from n = 600 alveolar macrophages grouped from three independent animals per NHP group. Lower panel: Correlation of the percentage of alveolar macrophages positive for Siglec-1 and pSTAT1, from the indicated NHP groups. Mean value is represented as a black line. (A–D) Each circle within vertical scatter plots represents a single donor and histograms median value. Statistical analyses: Two-tailed, Wilcoxon signed-rank test (A–D), Spearman correlation (F, H lower panel), and Mann-Whitney unpaired test (H, upper panel). \*p<0.05, \*\*p<0.01, \*\*\*p<0.001, \*\*\*\*p<0.0001. ns: not significant. See **Figure 2—source data 1**.

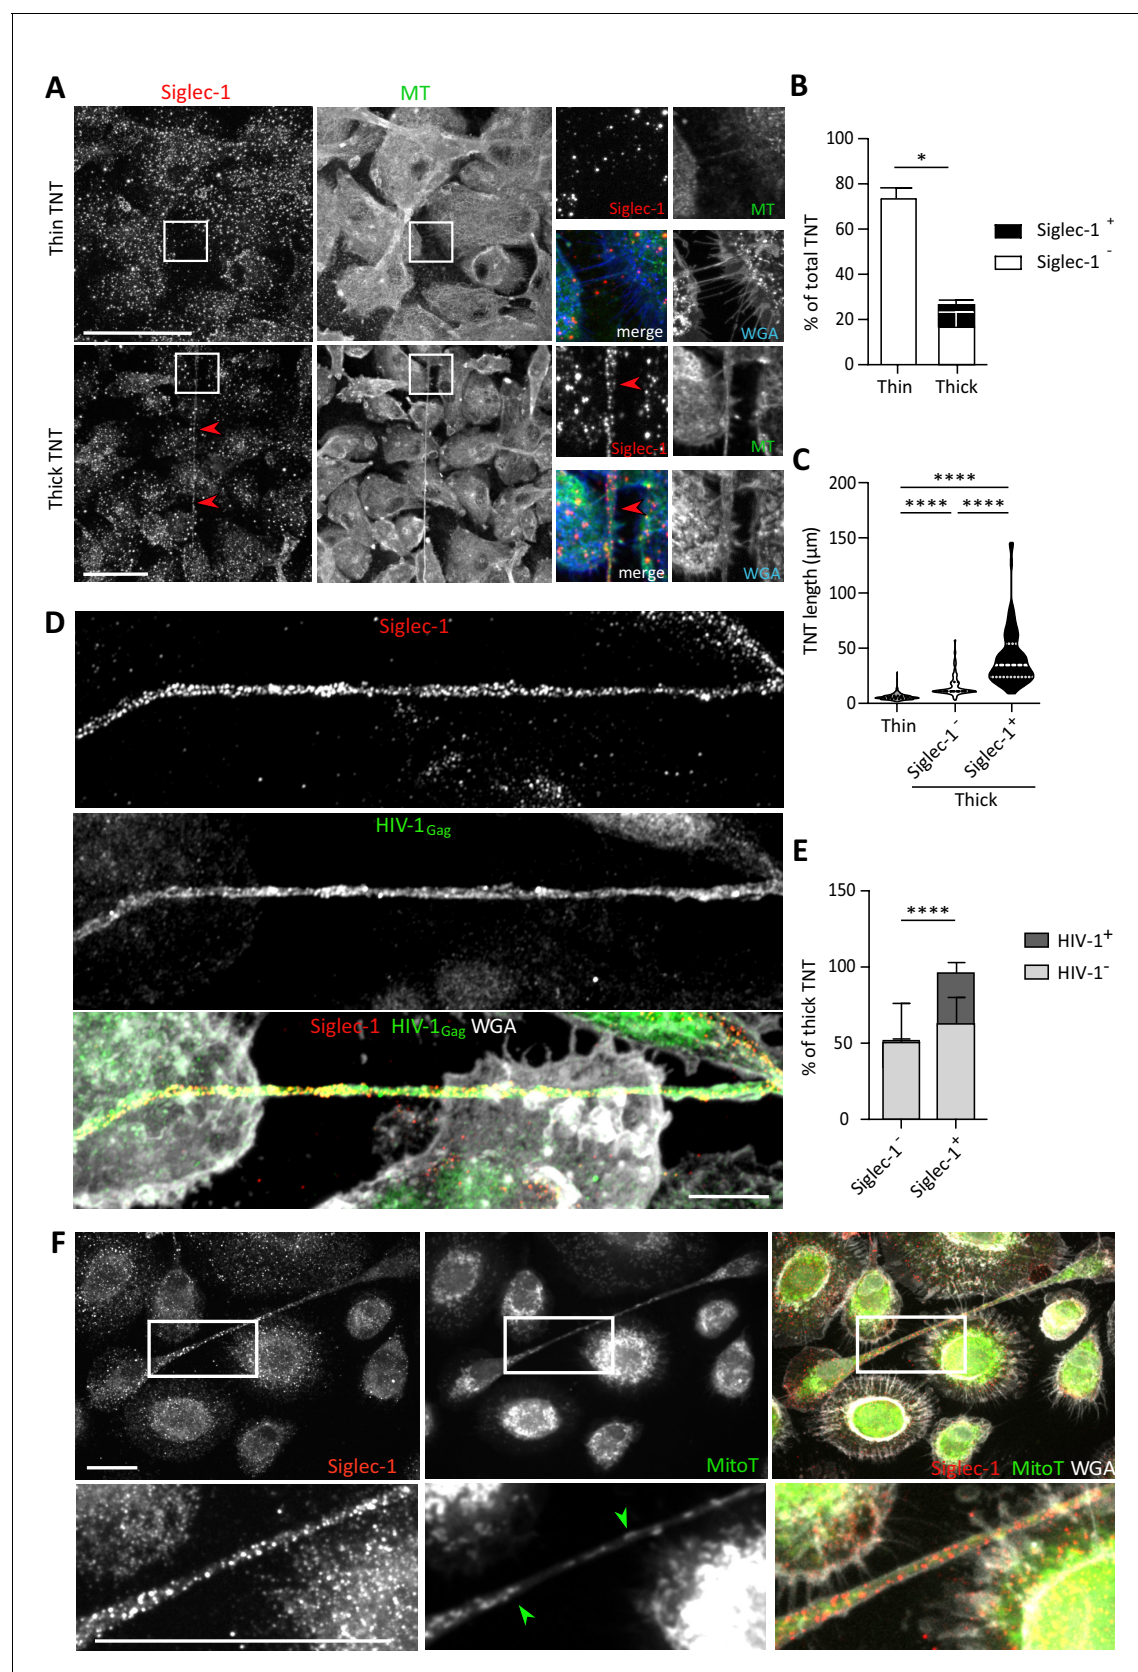

**Figure 3.** Siglec-1 localization on thick TNT is associated with their length and HIV-1/mitochondria cargo. (A–F) Human monocytes were differentiated into macrophages with cmMTB for 3 days, and then infected with HIV-1-ADA strain (unless indicated otherwise) and fixed 3 days post-infection. (A) Figure 3 continued on next page

*Figure 3 continued*

Representative immunofluorescence images of cmMTB-treated macrophages infected with HIV-1-ADA, and stained for extracellular Siglec-1 (red), intracellular tubulin (MT, green) and Wheat Germ Agglutinin (WGA, blue). Inserts are 3x zooms. Red arrowheads show Siglec-1 localization on TNT. Scale bar, 20  $\mu\text{m}$ . (B) Vertical bar plot showing the semi-automatic quantification of Siglec-1<sup>+</sup> TNT (black) and Siglec-1<sup>-</sup> TNT (white) in thick (WGA<sup>+</sup>, MT<sup>+</sup>) and thin (WGA<sup>+</sup>, MT<sup>-</sup>) TNT. 400 TNT were analyzed from two independent donors. (C) Siglec-1<sup>+</sup> TNT exhibit a larger length index. Violin plots displaying the semi-automatic quantification of TNT length (in  $\mu\text{m}$ ) for thin (WGA<sup>+</sup>, MT<sup>-</sup>), and thick TNT (WGA<sup>+</sup>, MT<sup>+</sup>) expressing Siglec-1 or not. 400 TNT were analyzed per condition from two independent donors. (D) Representative immunofluorescence images of cmMTB-treated macrophages 3 day post-infection with HIV-1-NLAD8-VSVG strain, and stained for extracellular Siglec-1 (red), intracellular HIV-1<sub>Gag</sub> (green) and WGA (grey). Scale bar, 10  $\mu\text{m}$ . (E) Vertical bar plots indicating the quantification of presence (dark grey) or absence (light grey) of HIV-1<sub>Gag</sub> in thick TNT (WGA<sup>+</sup>, MT<sup>+</sup>) expressing Siglec-1 or not. 120 TNT in at least 1000 cells were analyzed from four independent donors. (F) Representative immunofluorescence images of cmMTB-treated macrophages infected with HIV-1-ADA loaded with MitoTracker (MitoT, green), and stained for extracellular Siglec-1 (red) and WGA (grey). Inserts are 3x zooms. Green arrowheads show mitochondria inside TNT. Scale bar, 10  $\mu\text{m}$ . Statistical analyses: Two-way ANOVA comparing the presence of Siglec-1 in thin and thick TNT (B), and two-tailed Mann-Whitney unpaired test comparing TNT length (C) and the presence of HIV-1 in TNT (E). \* $p < 0.05$ , \*\*\* $p < 0.0001$ . See **Figure 3—source data 1**.



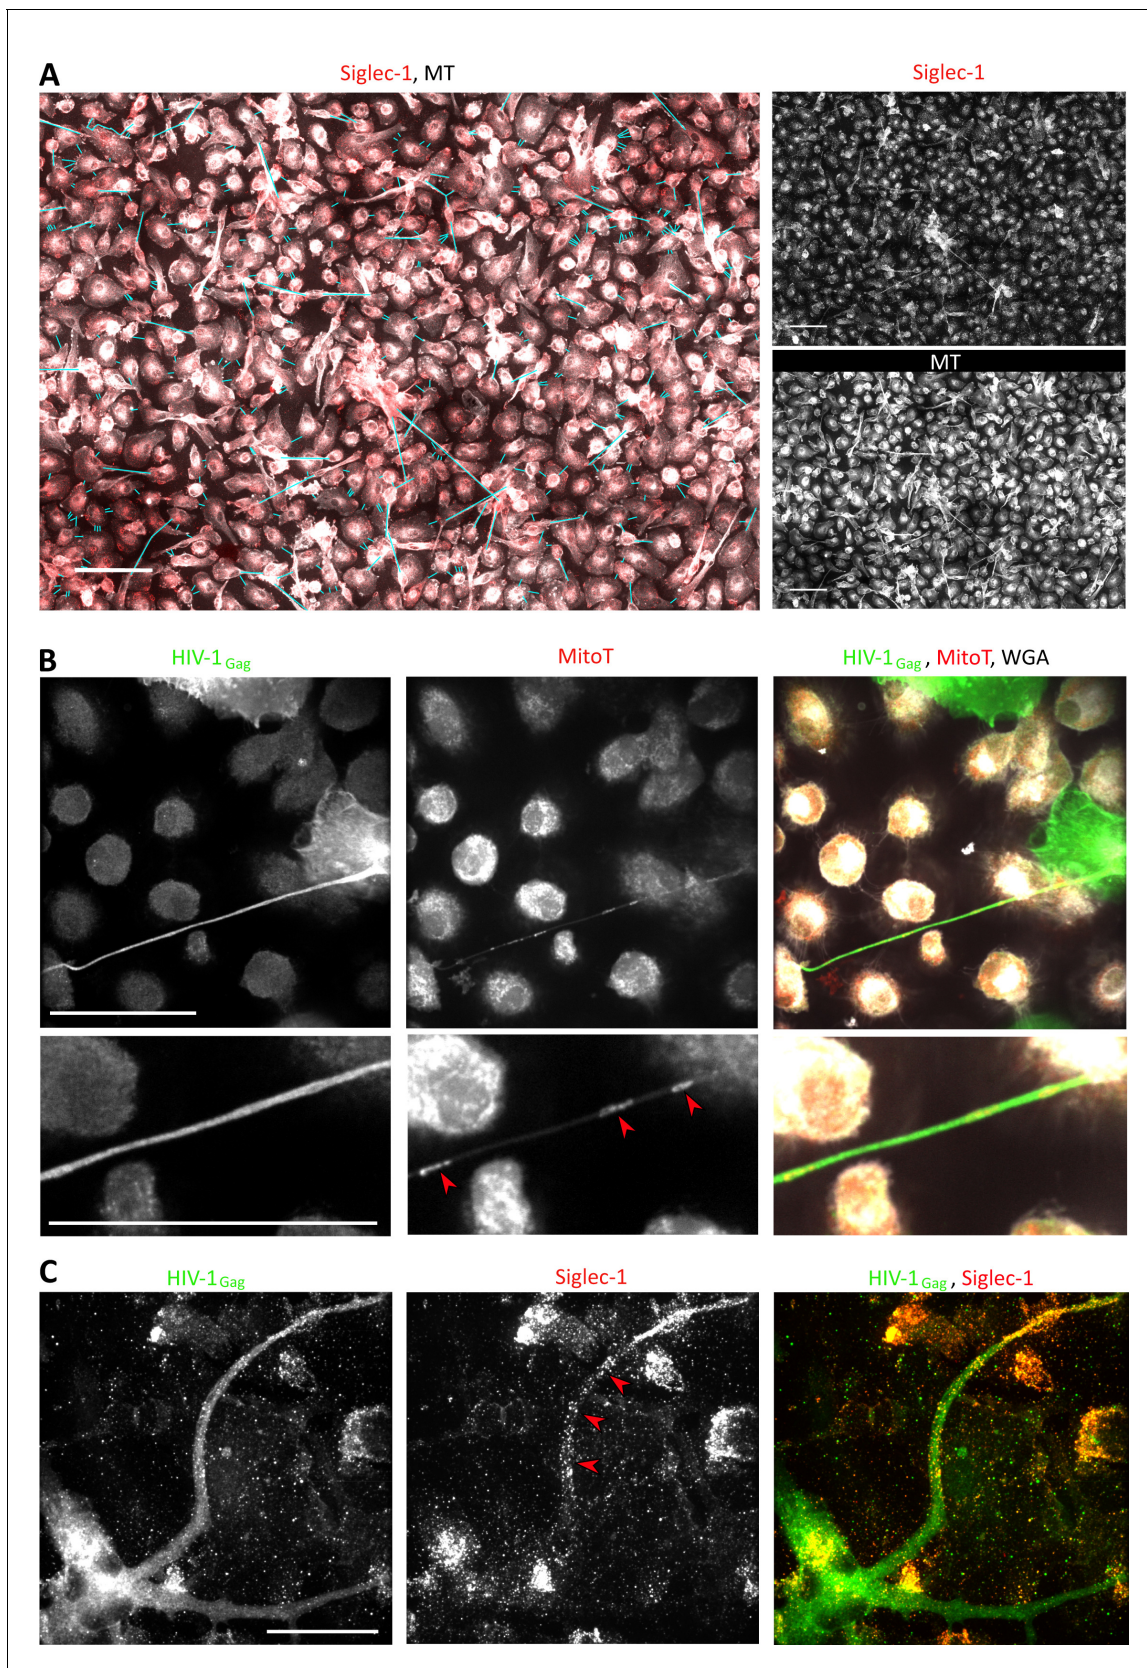

**Figure 3—figure supplement 1.** Siglec-1 localizes specifically on thick tunneling nanotubes that contain HIV-1<sub>Gag</sub> and mitochondria. (A–C) Human monocytes were differentiated into macrophages with cmMTB for 3 days, infected with HIV-1-ADA strain (unless indicated otherwise) and then fixed at

*Figure 3—figure supplement 1 continued on next page*



*Figure 3—figure supplement 1 continued*

day 3 (**A–B**) or 14 (**C**) post-infection. (**A**) Representative immunofluorescence images used for semi-automatic quantification of TNT in cmMTB-treated macrophages infected with HIV-1. Cells were stained for extracellular Siglec-1 (red), intracellular tubulin (MT, grey) and Wheat Germ Agglutinin (WGA, not shown). Blue lines show all TNT considered. Thick (WGA<sup>+</sup>, MT<sup>+</sup>) and thin (WGA<sup>+</sup>, MT<sup>−</sup>) TNT were assessed for Siglec-1 positivity by applying a threshold and measured in length. Scale bar, 20  $\mu$ m. (**B**) Representative immunofluorescence images of cmMTB-treated macrophages infected with HIV-1-NLAD8-VSVG, loaded with Mitotracker (MitoT, red) and stained for intracellular HIV-1<sub>Gag</sub> (green) and WGA (grey). Red arrowheads show mitochondria inside HIV-1<sub>Gag</sub>-containing TNT. Inserts are 2x zoom. Scale bar, 20  $\mu$ m. (**C**) Representative immunofluorescence images of cmMTB-treated macrophages infected with HIV-1 and kept in culture until day 14. Cells were fixed and stained for intracellular HIV-1<sub>Gag</sub> (green), extracellular Siglec-1 (red) and WGA (grey). Red arrowheads show Siglec-1 on HIV-1<sub>Gag</sub>-containing TNT emanating from an infected multinucleated giant cell (MGC). Scale bar, 20  $\mu$ m.

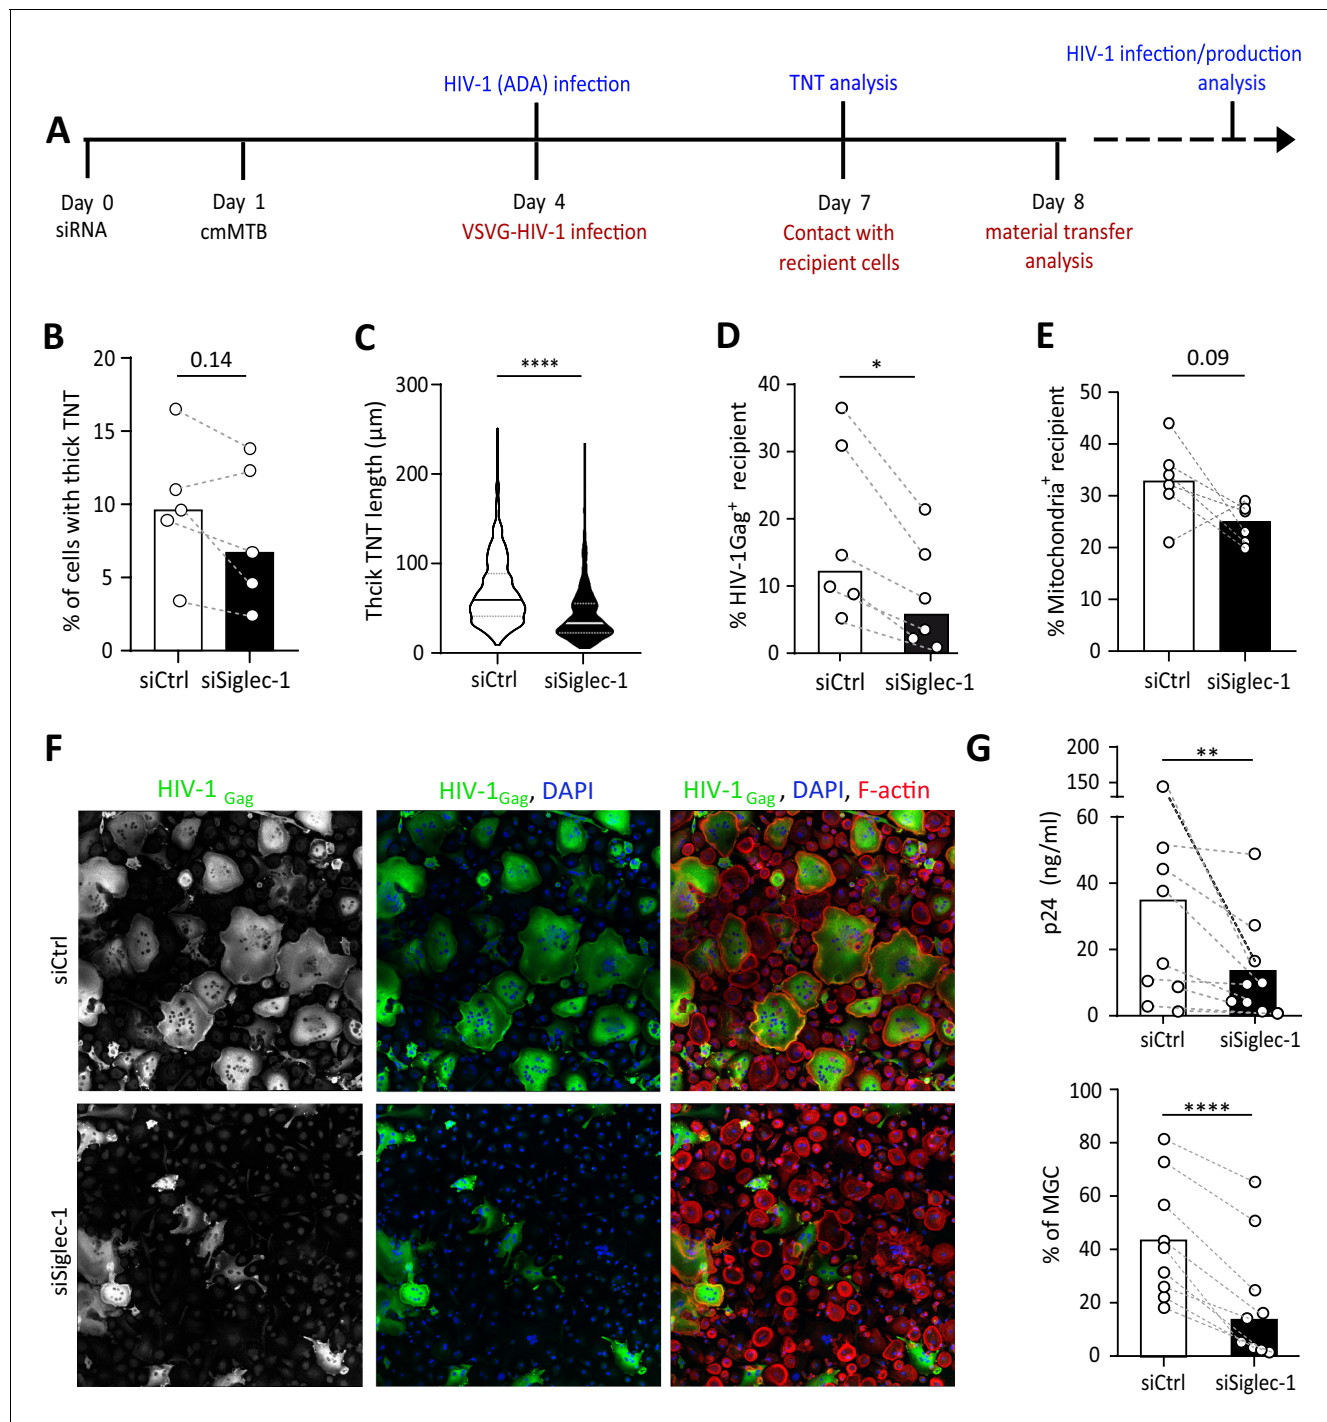

**Figure 4.** The exacerbation of HIV-1 infection and spread in macrophages treated with cmMTB requires Siglec-1. (A) Experimental design. Monocytes from healthy subjects were transfected with siRNA targeting of Siglec-1 (siSiglec-1, black) or not (siCtrl, white). A day after, monocytes were differentiated into macrophages with cmMTB for 3 days. Cells were then infected with HIV-1-ADA (blue protocol) to measure the formation (B) and length (C) of TNT at day 7, or assess HIV-1 production and multinucleated giant cell (MGC) formation at day 14 (F–G). In parallel, cells were either infected with HIV-NLAD8-VSVG or labelled with mitoTracker to measure the transfer (red protocol) of HIV-1 (D) or mitochondria (E), respectively. (B) Before-and-after plots showing the percentage of cells forming thick TNT (F-actin<sup>+</sup>, WGA<sup>+</sup>, MT<sup>+</sup>). (C) Violin plots displaying the semi-automatic quantification of TNT length (in μm) for thick (WGA<sup>+</sup>, MT<sup>+</sup>) TNT; 300 TNT were analyzed per condition from two independent donors. (D–E) Before-and-after plots indicating the percentage of HIV-1<sub>Gag</sub><sup>+</sup> cells (D) or MitoTracker<sup>+</sup> cells (E) among CellTracker<sup>+</sup> cells after 24 hr co-culture. (F) Representative immunofluorescence images of siRNA transfected cells treated with cmMTB, 14 days post-HIV-1 infection. Cells were stained for intracellular HIV-1<sub>Gag</sub> (green), F-actin (red) and DAPI (blue). Scale bar, 500 μm. (G) Vertical scatter plots showing HIV-1-p24 concentration in cell

Figure 4 continued on next page

*Figure 4 continued*

supernatants (upper panel) and percentage of MGC (lower panel) at day 14 post-HIV-1 infection in cells represented in F (siSiglec-1, black; siCtrl, white). **(B, D, E and G)** Each circle represents a single donor and histograms median value. Statistical analyses: Paired t-test (B, G lower panel) or two-tailed, Wilcoxon signed-rank test (C-E, G upper panel). \* $p < 0.05$ , \*\* $p < 0.01$ , \*\*\*\* $p < 0.0001$ . See **Figure 4—source data 1**.

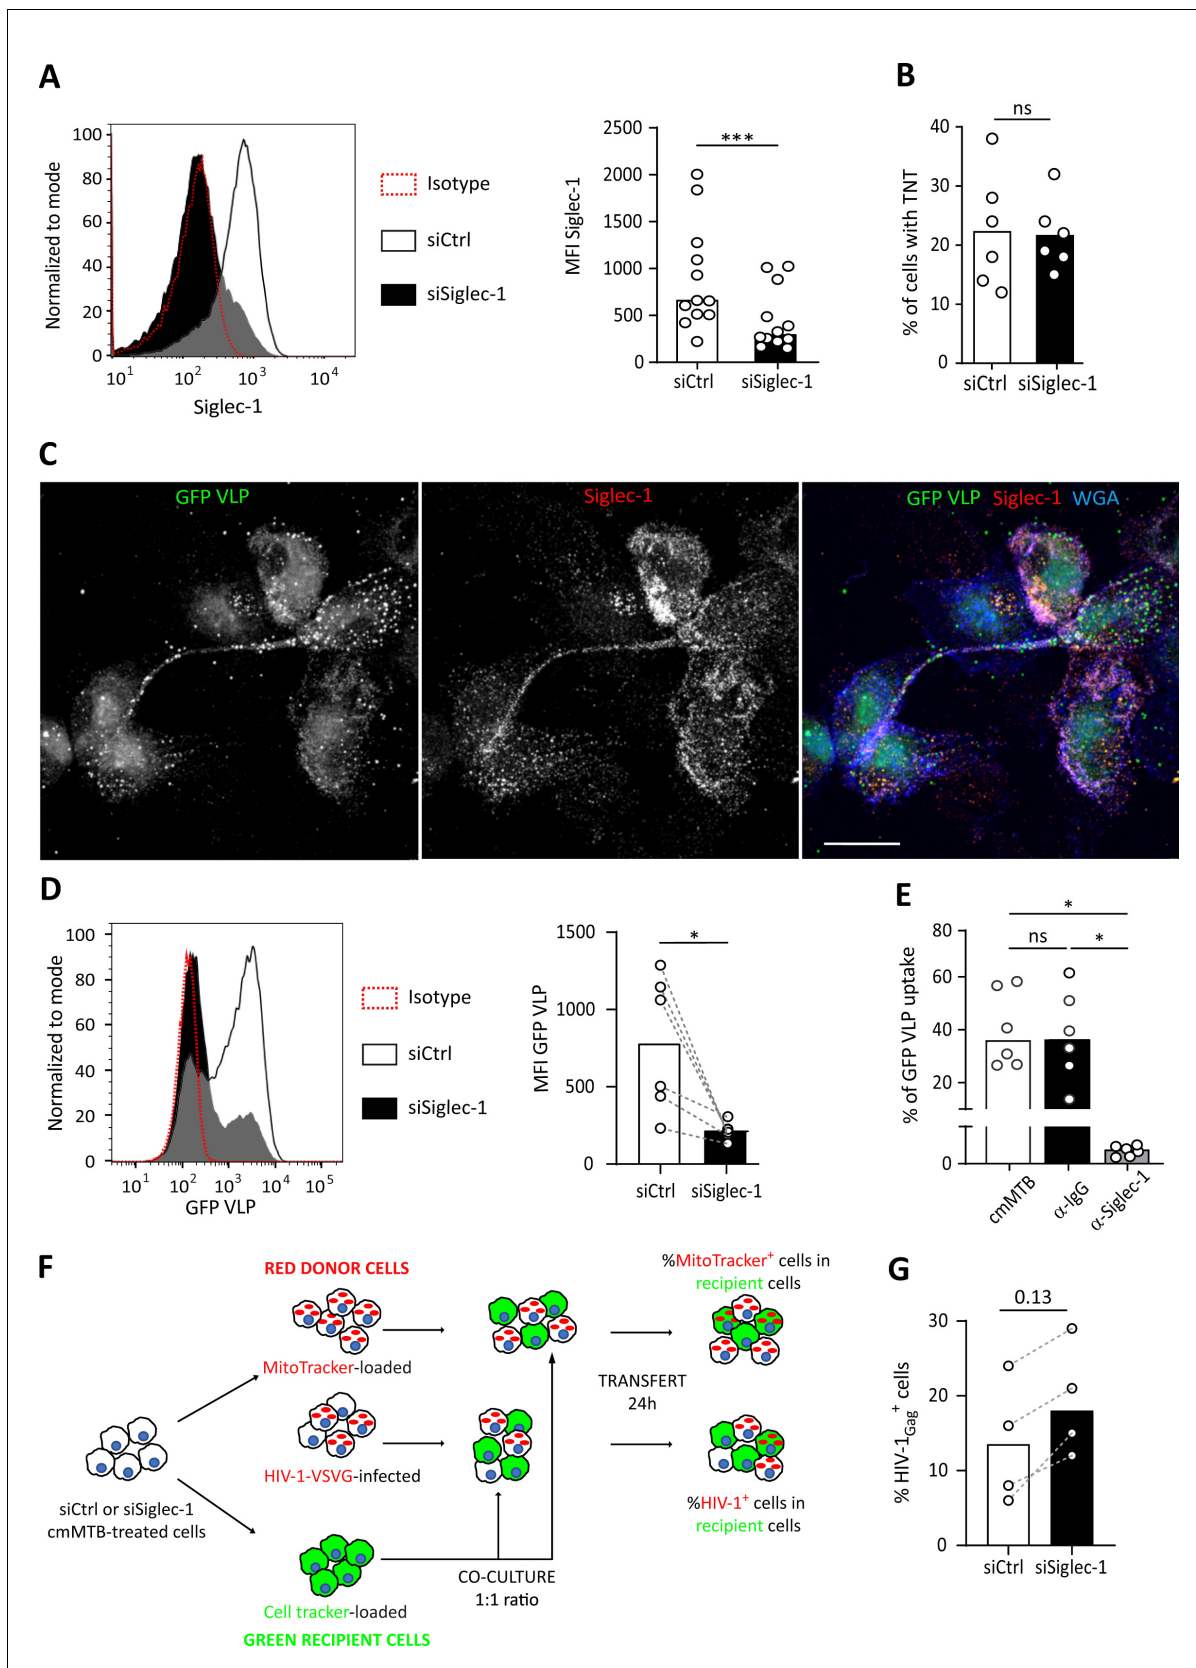

**Figure 4—figure supplement 1.** Siglec-1 is required for the capture and transfer of HIV-1 in cmMTB-treated macrophages. (A–D, F–G) Monocytes from healthy subjects were transfected with siRNA targeting of Siglec-1 (siSiglec-1, black) or not (siCtrl, white). A day after, monocytes were

Figure 4—figure supplement 1 continued on next page

## Figure 4—figure supplement 1 continued

differentiated into macrophages with cmMTB for 3 days. (A) Representative histogram (*left*) and vertical scatter plot showing the median fluorescent intensity (MFI) (*right*) of Siglec-1 expression on the indicated cell populations. (B) Vertical scatter plot indicating the percentage of cells forming TNT. (C–E) Inhibition of Siglec-1 reduces binding of HIV-1-Gag–eGFP virus like particles (GFP-VLP). (C) Representative immunofluorescence images of cmMTB-treated cells incubated with GFP-VLP (green) for 3.5 hr. Cells were fixed and stained for extracellular Siglec-1 (red) and Wheat Germ Agglutinin (WGA, blue). Scale bar, 500  $\mu$ m. (D) Representative histogram (*left*) and vertical scatter plot showing the median fluorescent intensity (MFI) (*right*) displaying of GFP-VLP binding in the indicated cell populations. (E) Vertical scatter plot showing the percentage of GFP-VLP binding in cmMTB treated cells pre-incubated with specific anti-Siglec-1 ( $\alpha$ -Siglec-1, grey), anti-Isotype control antibodies ( $\alpha$ -IgG, black) or mock (white). (F) Schematics of the experimental procedure for material (HIV-1 and mitochondria) transfer experiments. (G) Vertical scatter plot showing the percentage of HIV-1<sub>Gag</sub><sup>+</sup> cells at the time of co-culture experiment in the indicated cells. Statistical analyses: Two-tailed, Wilcoxon matched-pairs signed rank test (A, B, D–E, G). \* $p < 0.05$ , \*\*\* $p < 0.001$ . ns: not significant.
